# Supplementary material for: Implications of the foliar phytochemical diversity of the avocado crop Persea americana cv. Hass in its susceptibility to pests and pathogens
Source: PeerJ. 2021 Jul 20;9:e11796. doi: 10.7717/peerj.11796 (PMC8759378; doi:10.7717/peerj.11796)
Supplement: Supplemental Information 2 — This also includes phytochemical diversity metrics at the tree and orchard scale and the chemotype for each tree. The trees are organized by the orchard. The matrix with those data was used to calculate the phytochemical diversity matrix, to analyze the data with cluster analysis to identify compositional types, and to relate the foliar metabolites with plant enemies using canonical correspondence analysis. [file peerj-09-11796-s002.xlsx]

## Sheet: Matrix comp+enemies by trees
Orchard	Tree	b-pinene	b-mircene	a-terpinene	p-cymene	limonene	b-Z-ocimene	g-terpinene	a-terpineol	estragole	eugenol	b-caryophyllene	a-Humulene	germacrene.D	a-farnesene	d.cadinene	germacrene.B	germacren-D-4-ol	caryophyllene.oxide	myristic.acid	octadecane	farnesylacetate	1-hexadecanol	palmitic.acid	methyl.linoleate	Phytol	ethyl.linoleate	2-[(8Z,11Z)-Heptadeca-8-11-dieneyl]furan	tricosane	Androstan-17-one, 3-ethyl-3-hydroxy-, (5à)-	17-Pentatriacontene	2-Hexadecenoic acid, methyl ester, (E)-	Linoleic acid ethyl ester	unknown1	unknown2	unknown3	17-Pentatriacontene	b-Stigmasterol	7,10,13-Eicosatrienoic acid, methyl ester	7,10,13-Eicosatrienoic acid, methyl ester	heptacosane	persin 1	persin 2	squalene 1	squalene 2	eicosane	b-tocopherol	Conc total	Comp type
O1	A1	0	0	0	0	0	0	0	0	1006.5	0	0	0	2484.95	0	0	0	0	3168.29	3237.6	1051.2	866.05	494.74	1122.1	767.27	99.61	35.85	0	3012.67	0	3129.24	0	98.96	141.67	0	294.86	150.49	345.19	192.68	0	0	35.65	0	211.4	0	0	688.33	22635.3	1
O1	A2	0	0	0	0	0	0	0	0	634.55	1096.55	1685.11	1240.49	1070.32	1172.94	1153.2	634.55	571.08	1724.93	540.8	572.94	462.83	299.55	509.8	495.55	28.74	0	0	0	0	0	0	116.83	264.61	274.6	0	68.1	195.25	83.06	0	0	24.01	0	27.65	0	554.67	112.52	15615.2	2
O1	A3	0	0	0	4676.42	6834.85	0	0	0	3730.39	6283.52	4088.09	0	0	0	0	0	2239.87	5047.92	7393.97	2934.35	6511.24	1258.72	2340.3	849.17	825.57	341.34	1047.15	842.83	0	0	1152.63	575.76	1111.61	456.44	0	1200.1	809.61	547.87	1298.26	394.2	282.83	737.33	5608.76	464.23	454.09	6483.01	78822.4	3
O1	A4	0	0	0	0	0	0	0	0	942.25	0	1635.11	0	1500.69	0	1061.23	0	811.7	0	1324.78	427.94	395.99	248.97	0	1147	32.68	39	0	1754.61	0	212.34	0	0	223.42	166.06	205.29	109.4	311.33	95.18	64.7	175.8	219.67	222.6	266.3	230.79	289.74	213.92	14328.5	4
O1	A5	0	0	0	0	0	0	0	0	0	0	0	0	3609.55	0	4817.13	0	2323.34	2793.13	2814.06	1091.16	3176.85	1396.11	1876.39	2856.36	3654.29	137.71	0	472.34	0	0	597.81	241.11	696.1	184.33	0	1000.91	484.16	276.33	0	207.22	165.86	245.19	3806.5	0	0	292.78	39216.7	4
O1	A6	0	0	0	0	0	0	0	0	279.73	689.03	991.38	805.12	1449.21	1469.13	701.81	1039.3	573.63	1178.76	830.28	207.27	163.81	195.95	132.49	0	53.72	22.21	0	0	0	0	0	304.04	176.08	108.74	0	116.55	93.54	171.21	0	99.74	167.68	0	191.35	35.46	1576.62	569.02	14392.9	4
O1	A7	0	0	0	0	0	0	0	0	1549.51	2856.92	4053.46	5525.33	3461.25	1436.68	3180.28	3800.31	3897.86	1372.54	4530.66	1466.57	1908.43	993.04	537.88	552.19	41.81	58.3	53.61	3402.46	221.76	276.39	136.52	345.65	177.44	186.57	35.18	3547.85	4580.33	1858.2	46.17	840.53	283.09	3643.77	0	0	0	0	60858.5	4
O1	A8	0	0	0	0	0	0	0	0	0	5381.66	5618.92	5345.91	5201.97	0	4543.19	3581.46	3295.96	3004.46	3550.67	2542.99	1342.93	1320.68	2121.73	1575.03	62.81	71.65	0	3442.92	0	348.38	0	155.87	407.38	0	0	140.7	326.01	406.15	676.57	191.56	38.75	5269.9	84.13	263.47	621.93	287.81	61223.5	4
O1	A9	0	0	0	0	0	0	0	0	567.03	0	0	0	0	0	0	0	0	0	0	339.02	458.78	237	606.11	233.82	20.49	165.48	0	0	0	0	54.37	86.06	126.58	94.12	0	196.98	85	122.01	0	17.32	530.01	0	564.96	0	0	355.94	4861.08	5
O1	A10	0	0	0	0	0	0	0	0	0	0	5810.94	6290.63	7507.9	0	5316.94	6079.09	7606.25	0	1423.73	719.12	738.21	1200.97	1310.56	822.13	214.6	82	196.95	0	0	0	0	230.96	0	258.55	0	0	0	998.96	309.66	300.92	75.09	0	108.33	0	0	1974.51	49577	6
O1	A11	0	0	0	0	0	0	0	0	361.69	0	1389.03	0	1116.46	0	0	0	831.61	0	770.99	390.63	591.94	364.45	314.97	0	25.98	38.98	0	0	0	0	0	0	0	99.64	0	143.56	71.1	152.6	126.41	75.67	17.29	0	29.22	993.61	81.97	95.1	8082.9	6
O1	A12	0	0	0	0	0	0	0	0	2292.68	2585.86	2345.51	3084.18	1875.1	0	2283.3	2681.34	1848.78	2411.98	1246.03	770.53	936.03	643.86	564.23	0	0	79.82	0	0	0	0	0	315.05	624.44	361.17	686.72	583.76	464.84	424.3	0	0	80.3	528.26	449.45	544.64	473.99	447.33	31633.5	6
O1	A13	0	0	0	0	0	0	0	0	4174.6	0	0	0	0	0	0	0	0	0	0	5907.05	0	6381.69	4177.59	0	0	739.6	0	0	0	0	0	4528.88	0	0	0	0	4114.89	3370.81	0	0	834.65	0	1970.86	0	5609.4	2347.63	44157.7	7
O1	A14	0	0	0	0	0	0	0	0	2153.6	0	1759.24	0	0	0	0	0	0	0	0	1530.09	1417.16	980.96	598.8	874.01	0	58.18	0	0	0	0	0	223.81	290.38	423.43	0	363.78	687.33	283.33	0	0	67.28	0	682.86	949.48	0	1972.04	15315.8	7
O1	A15	0	0	0	0	0	0	0	0	0	0	2300.05	2180.91	1971.13	1563.91	1129.3	2588.44	628.11	1716.92	1814.84	1767.57	1638.02	393.68	880.54	230.28	1885.03	141.44	0	342.4	0	330.14	386.17	117.93	169.81	337.94	0	521.29	304.57	309.72	423.59	447.74	165.6	163.31	327.82	451.63	350.89	453.39	28434.1	8
O2	A1	0	0	0	0	0	0	0	0	2571.07	1931.78	2228.04	2129.71	2857.64	2415.17	1974.34	2142.89	1493.92	1704.33	2135.35	614.87	682.66	335.26	873.19	1557.59	67.51	0	0	0	0	0	370.12	104.68	81.03	0	0	0	314.63	163.04	0	484.77	45.69	0	73.26	372.28	241.98	164.58	30131.4	9
O2	A2	0	0	0	3.69	44.37	11.06	8.06	0.23	511.21	4.85	27.05	3.01	37.01	9.62	21.24	11.31	28.85	4.97	14.96	62.63	104.51	333.07	238.99	59.54	175.67	268.36	28.1	69.81	75.08	9.42	153.43	1319.7	899.96	118.77	76.1	628.27	201.13	545.04	73.63	78.25	527.57	167.13	228.12	129.46	29.3	0	7342.53	9
O2	A3	0	0	0	0	0	0	0	0	945.61	0	0	1570.18	1760.88	1481.76	1720.29	1390.88	1208.39	1244.06	1763.55	351.96	344.31	218.6	560.77	935.72	28.52	36.51	0	0	0	0	212.82	62.45	67.12	0	0	179.35	190.91	92.42	0	279.22	26.25	0	40.9	92.6	942.9	107.1	17856	10
O2	A4	0	0	0	0	0	0	0	0	1726.56	0	0	0	0	0	0	0	2458.3	0	615.97	848.21	380.05	455.9	650.58	0	34.15	47.78	0	0	0	0	303.97	90.43	130.59	281.91	0	216.33	312.55	166.05	0	436.05	139.81	82.92	296.95	649.97	0	173.93	10499	10
O2	A5	0	0	0	0	0	0	0	0	459.79	0	0	0	0	0	0	0	62.91	27.38	148.81	18.74	17	73.45	124.71	585.84	170.31	240.69	31.68	60.73	77.99	38.13	1348.68	13389.5	640.54	160.15	59.65	92.27	108.46	5389.19	4.65	164.24	205.34	223.42	254.91	0.91	11.72	838.24	25030	10
O2	A5b	0	0	0	0	0	0	0	0	45.98	0	0	0	0	0	0	0	6.29	2.74	14.88	1.87	1.7	7.35	12.47	58.58	17.03	24.07	3.17	6.07	7.8	3.81	134.87	1338.95	64.05	16.01	5.96	9.23	10.85	538.92	0.46	16.42	20.53	22.34	25.49	0.09	1.17	83.82	2502.97	10
O2	A6	0	0	0	1.54	7.69	6.87	3.96	0	469.83	6.46	14	19.65	39.58	10.64	29.02	12.82	60.63	0	24.57	69.6	78.49	388.05	0	0	157.29	434.39	68.11	52.96	90.12	25.65	129.62	2475.62	485.85	198.99	261.14	427.62	3.27	484.05	84.79	116.14	537.27	352.2	40.84	298.07	0	93.95	8061.34	10
O2	A7	0	0	0	0	0	0	0	0	1003.76	217.34	1408.97	0	1393.43	0	0	0	523.11	0	0	0	50.56	66.38	248.61	0	106.92	0	0	0	0	0	0	3992.03	1296.14	800.73	0	0	510.52	243.4	0	356.11	611.86	290.07	270.67	150.13	142.39	529.18	14212.3	10
O2	A8	0	0	0	0	0	0	0	0	504.79	5.99	36.1	13.53	44.56	2.82	6.13	14.41	35.77	3.46	6.32	53.48	63.07	412.5	204.92	137.9	168.29	536.09	0	59.31	0	0	197.43	12435.4	244.29	100.74	975.82	6823.31	173.92	653.5	2021.49	1711.28	2574.11	76.17	103.42	10.82	22.66	249.73	30683.5	10
O2	A9	0	0	0	0	0	0	0	0	523.53	12.25	51.53	8.1	65.03	15.09	30.19	0	63.18	7.33	21.03	18.85	101.66	415.86	228.3	50.01	73.58	321.44	102.55	57.54	87.69	40.88	258.56	617.74	850.16	217.58	116.49	536.64	206.95	492.5	88.1	93.23	338.71	70.55	221.15	78.89	95.03	43.13	6621.03	10
O2	A10	0	0	0	0	0	3.99	3.25	0	508.95	7.46	52.08	6.33	43.94	14.14	2.23	0	46.54	16.82	15.52	10.36	186.26	128.81	185.05	482.59	146.61	5554.74	15.2	33.61	64.18	17.24	426.81	3537.88	579.64	42.05	21.08	602.29	673.91	451.6	5.92	129.6	1151.77	78.84	172.35	102.9	137.47	0	15660	10
O2	A11	0	0	0	0	0	0	0	0	520.21	17.08	39.88	6.86	59.88	10.9	7.15	0	57.87	20.87	18.1	12.27	98.51	339.16	197.13	178.41	17.66	249.49	74.02	50.37	66.09	35.18	39.98	4739.82	843.09	198.8	112.23	352.51	205.28	2825.5	86.1	675.18	353.02	125.81	192.52	79.02	77.58	31.94	13015.5	10
O2	A12	0	0	0	0	0	0	0	0	0	0	0	0	0	0	0	0	360.86	0	0	815.18	755.98	1246.8	795.2	548.1	19951.5	8313.56	0	0	0	0	1321.06	5703.67	3427.57	1700.29	0	1539.35	1426.79	2536.26	0	1351	8550.85	0	1372.77	496.97	1289.85	2279.43	65783.1	10
O2	A13	0	0	0	0	0	0	22.97	0	496.53	2.95	9.61	39.7	11.04	66.73	27.52	58.72	10.44	20.21	37.68	21.52	184.91	248.22	73.65	69.17	145.42	292.46	50.02	26.9	75.77	71.31	279.19	1728.56	858.03	5104.72	108.75	588.32	219.22	4354.34	81.21	154.73	1496.79	63.1	202.83	971.04	564.06	906.46	19744.8	10
O2	A14	0	0	0	0	0	0	0	0	502.58	4.2	22.42	3.58	54.35	7.46	6.76	0	54.77	20.45	2.05	8.77	3.66	59.63	102.85	138.16	16.12	23.29	12.65	35.36	38.93	27.35	1036.7	11350.7	677	187.82	82.85	240.57	127.11	6517.93	40.17	147.3	139.85	802.58	158.55	14.76	133.95	110.26	22913.5	10
O2	A15	0	0	0	0	0	0	0	0	0	0	0	0	0	0	0	0	0	0	0	23.21	93.35	546	207.05	195.21	15.48	621.01	10.98	0	0	32.67	1556.13	5636.75	27905.8	41.41	0	0	177.28	292.31	6.85	52.28	232.43	64.69	99.5	4.99	9.8	0	37825.2	10
O3	A1	0	0	0	0	0	0	0	0	522.36	13.2	40.59	0	55.89	0	10.09	0	15.19	3.35	25.05	49	6.9	361.82	0	144.18	161.79	337.43	76.92	70.16	87.58	26.15	242.64	2447.32	941.08	241.56	94.68	638.27	271.39	738.16	82.38	123.62	404.44	78.96	128.23	114.31	295.12	21.72	8871.53	10
O3	A2	0	0	0	0	0	0	112.11	458.31	499.39	529.22	541.41	423.59	849.55	0	510.65	991.58	949.62	354.57	657.17	1519.86	1256.73	1528.63	248.04	1130.69	1053.04	717.55	219.15	1114.82	984.6	886.65	2138.72	12188.5	667.76	343.99	180.06	265.28	139.4	1496.34	406.43	716.68	1954.85	184.71	175.57	1226.37	338.29	8275.97	48235.8	10
O3	A3	0	0	0	0	0	0	0	30.84	201.55	142.81	190.38	193.5	436.89	0	243.38	0	311.52	228.54	213.88	316.89	587.83	669.28	232.72	166.77	239.16	1584.86	507.26	373.29	121.98	355.69	0	3755.13	243.83	40.44	23.42	116.17	87.73	594.61	109.26	204.87	393.8	127.77	429.04	249.03	38.1	2706.54	16468.8	10
O3	A4	0	0	0	0	0	0	66.14	0	216.35	237.94	138.24	135.61	170.42	109.99	105.84	0	374.56	103.5	84.85	429.24	670.81	844.5	38.28	196.99	244.03	323.02	289.23	901.71	399.46	299.38	476.76	7655.73	278.67	114.74	60.67	46.38	140.33	63.2	1313.84	671.38	690.13	84.27	684.15	321.91	0	3856.17	22838.4	10
O3	A5	0	0	0	105.77	90.92	264.92	808.82	348.17	0	0	0	0	1333.09	0	0	0	1880.15	300.82	303.54	1213.04	1934.48	1522.01	358.2	670.49	1322.13	4742.03	2704.72	976.26	436.69	543.82	573.81	9961.57	1097.34	629.36	191.13	694.28	5977.78	550.18	838.19	452.58	3183.86	1901	1777.39	1504.02	762.46	8879.92	60834.9	10
O3	A6	0	0	0	0	0	0	0	0	451.97	336.27	880.38	592.14	308.74	980.3	998.86	269.61	1452.92	730.25	223.05	69.27	988.65	1429.27	83.24	396.43	224.4	925.48	0	237.84	176.65	323.26	106.82	2814.97	7543.33	88.93	257.58	176.02	202.11	268.35	94.95	137.71	490.04	79.32	383.14	541.96	0	1064.4	26328.6	10
O3	A8	0	0	0	0	0	0	0	0	156.14	100.36	165.53	0	138.31	0	197.5	171.2	317.34	118.35	34.38	242.68	780.33	1606.46	29.63	208.57	424.02	1007.49	1466.94	347.85	344.1	241.2	2199.61	14939.2	496.56	111.48	128.54	1446.56	464.79	1467.7	106.44	1950.67	1146.31	77.74	751.29	494.91	0	4607.58	38487.8	10
O3	A10	0	0	0	0	0	0	0	477.32	684.92	524.29	600.13	224.12	0	682.39	351.58	789.24	494.85	1108.09	596.99	465.74	2269.51	1175.77	265.24	500.24	4692.19	3748.65	1248.62	483.99	229.99	581.24	639.48	4608.76	105.4	201.82	0	794.59	287.65	1736.57	419.39	445.54	866.91	190.69	638.82	10789.7	0	0	43920.4	10
O3	A11	0	0	0	0	0	0	0	13.29	488.45	57.93	12.79	23.37	9.24	37.86	1.19	104.48	3.85	60.19	18.14	2.94	127.93	132.64	215.01	144.18	690.1	362.08	311.73	10.78	2.79	13.62	230.8	2165.86	910.78	168.79	8.52	599.15	20.25	763.82	56.73	69.48	187.92	45.87	457.12	652.83	45.93	482.62	9711.05	10
O3	A12	0	0	0	0	0	0	0	0	52.6	0	96.04	0	276.45	0	437.98	113.59	123.09	104.66	89.14	536.13	579.73	1011.5	0	0	4109.48	767.64	41.06	17.36	26.29	325.88	271.81	7292.04	159.76	121.62	161.92	496.94	216.14	889.21	23.96	175.04	1066.89	75.35	1288.02	245.3	3504.9	2092.07	26789.6	10
O3	A13	0	0	0	0	0	0	0	35.22	0	4.67	9.05	3.32	9.95	5.38	7.04	24.19	41.49	5.27	18.51	49.26	200.3	206.88	14.27	31.42	214.51	330.75	80.48	9.53	11.65	9.88	188.39	1905.79	58.73	13.16	23.85	54.3	52.49	89.89	13.9	94.84	144.81	9.87	49.17	93.1	20.11	455.29	4590.71	10
O3	A14	0	0	0	0	0	0	0	0	89.1	84.16	147.02	0	0	0	0	0	116.09	0	109.71	267.16	462.89	948.88	0	0	1786.69	5096.17	835.76	461.3	194.49	143.27	311.26	4159.63	149.75	149.21	0	329.82	244.24	936.32	348.65	78.19	911.36	267.59	1414.81	269.67	977.38	236.32	21526.9	10
O3	A15	0	44.26	0.08	8.86	0	0	0	0	515.35	0	0	0	0	0	0	0	37.99	14.05	67.05	143.77	95.88	28.18	260.05	103.3	797.95	48.48	0	50.05	199.17	24.84	234.23	1112.82	870.55	169.42	111.07	607.66	200.61	313.85	64.79	16.22	77.4	70.06	204.04	99.35	534.79	350.6	7476.77	10
O4	A1	0	0	0	120.25	261.82	0	0	1351.78	0	0	0	0	0	0	0	0	404.21	2200.26	1137.83	362.11	250.92	2031.32	276.51	735.9	180.05	910.12	293.28	301.73	211.56	176.22	421.86	12715.6	172.12	394.34	267.32	142.51	538.1	830.53	479.3	670.11	732.82	121.54	314.14	104.26	290.6	1805.76	31206.8	11
O4	A2	0	0	0	0	0	0	68.41	0	513.18	41.35	55.76	25.35	149.05	0	89.06	0	79.1	28.61	3.85	87.55	111.53	252.61	225.45	127.02	173.2	450.27	96.38	44.35	65.28	31.25	210.74	2472.52	910.1	193.47	80.23	623.13	172.24	420.35	34.73	114.04	48.5	11.36	498.51	132.66	135.08	971.56	9747.83	11
O4	A3	0	0	0	0	0	0	0	87.56	259.99	392.63	436.81	398.77	958.78	594.43	953.8	0	648.92	0	713.22	875	1330.91	1154.67	227.8	538.9	713.69	883.49	608.75	2412.17	1603.08	762.07	1523.24	7476.96	583.96	490.14	92.69	123.96	314.56	10488.1	461.16	368.89	1173.8	279.17	964.23	0	0	4889.36	45785.7	11
O4	A4	0	0	0	0	0	0	0	0	0	0	0	0	30.21	135.54	75.12	14.36	149.36	0	0	33.31	92.9	380.29	221.87	89.86	31.63	2.26	207.76	5.49	10	0	233.66	3109.51	862.67	130.3	82.01	614.4	253.56	322.82	1.48	102.75	254.38	30.62	65.57	23.42	54.41	670.44	8291.96	11
O4	A5	0	0	0	0	0	0	0	0	31.54	498.81	565.19	1084.09	876.49	1195.82	869.78	0	966.5	112.68	0	108.76	677.16	211.01	263.23	369.15	225.94	1024.35	643.43	603.25	354.02	66.44	778.33	2500.43	2013.53	128.39	226.58	128.39	104.95	226.58	376.47	188.3	1553.82	282.35	0	0	0	0	19255.8	11
O4	A6	0	0	0	0	0	0	0	962.79	1494.08	307.62	528.81	887.74	1924.9	780.93	1896.16	3006.41	1518.56	729.25	1044.93	952.69	1041.03	763.66	1079.82	620.14	627.64	6013.49	5103.21	2653.84	545.9	1110.09	324.12	562.73	0	330.42	1643.5	1599.72	1710.47	1025.45	1122.76	0	2700.86	2126.29	1258.58	929.35	0	0	50927.9	11
O4	A7	0	0	0	0	0	0	0	0	684.27	748.67	733.09	0	866.4	0	549.6	544.75	901.6	1094.13	467.65	938.35	1411.22	1688.47	282.38	295.56	1164.08	3016.65	1536.21	760.24	392.97	381.68	160.64	4469.75	566.58	624.08	0	384.69	475.26	1375.22	621.6	810.61	2125.48	318.22	2026.45	428.64	506.98	4218.36	37570.5	11
O4	A8	0	0	0	0	0	0	0	0	487.19	0	16.05	21.35	7.57	19.64	47.27	0	87.02	1.82	5.03	21.36	274.53	46.22	258.39	28.87	1131.11	995.34	296.41	36.29	58.78	19.09	228.75	439.93	828.06	166.36	0	17.14	312.89	682.97	43.98	97.34	1079.43	41.96	132.41	73.17	1732.15	636.6	10372.5	11
O4	A9	0	0	0	0	870.43	1177.06	2195.21	1102.07	1127.66	732.48	1633.7	1098.2	1286.39	943.13	361.75	559.8	2231.07	471.35	446.43	2033.89	1135.59	1630.02	651.91	422.17	121.4	335.74	341.43	236.93	161.4	338.14	1965.01	3253.8	337.58	523.68	108.12	63.14	466.39	1113.18	310.82	575.78	1586.97	530.19	2505.5	1320.27	0	167.81	38473.6	11
O4	A10	0	0	0	0	0	0	0	0	900.37	641.28	722.6	1001.9	1110.68	975.01	1452.97	935.48	1043.4	978.75	1449.36	1192.48	980.69	1613.13	363.92	375.77	745.96	6378.92	2075.15	811	452.43	417.2	1820.08	3485.11	831.96	347.97	203.04	515.92	920.67	766.25	669.38	389.41	2002.17	972.61	851.76	979.1	650.26	5341.89	47366	11
O4	A11	0	0	0	0	0	0	0	0	1078.76	710.73	745.12	737.62	722.88	476.57	1643.91	0	670.46	1337.15	723.95	578.34	1073.5	1820.88	871.95	657.2	1104.8	8328.05	2016.11	1709.81	455.03	552.41	360.06	3049.58	280.92	394.88	424.59	820.25	872.79	516.11	763.73	510.32	1800.05	319.98	1274.78	193.33	591.71	6163.49	46351.8	11
O4	A12	0	0	0	0	0	0	0	10.95	93.03	27.27	54.19	0	31.78	28.15	179.26	0	86.09	0	42.35	105.84	57.9	156.27	165.54	0	17.59	14.77	17.22	67.52	44.88	36.67	45.95	698.16	873.87	362.49	81.48	10.94	128.13	1630.86	19.45	26.72	497.49	225.81	204.73	16.09	78.75	1495.51	7633.7	11
O4	A13	0	0	0	0	0	0	0	0	0	0	487.27	489.32	428.22	0	0	0	1069.06	522.17	503.95	735.61	785.01	1761.91	167.32	196.21	798.01	2241.13	1321.22	824.36	330.37	153.98	1633.71	12463.4	2137.59	582.54	427.38	2985.86	1607.44	7413.72	367.35	372.68	1351.2	0	4845.17	386.42	627.61	3850.59	53867.8	11
O4	A15	0	0	0	0	0	0	0	0	239.47	0	297.04	95.31	130.65	102.79	294.96	293.53	703.56	249.11	192.72	545.45	1180.09	2125.56	101.7	529.05	734.75	1767.82	202.16	467.54	380.62	397.74	512.17	20330.7	907.03	341.32	205.19	166.19	312.36	9442.32	378.94	354	2791.6	176.15	1040.86	596.88	232.29	4935.37	53755	11
O5	A1	0	0	0	0	0	0	0	0	0	0	0	0	0	0	0	0	0	0	0	132.12	21.19	655.77	0	0	158.81	314.55	0	174.45	0	71.27	318.95	5276.15	21.74	52.23	0	715.54	1761.59	557.88	202.96	287.36	5694.62	67.02	857.82	1393.47	39.1	0	18774.6	11
O5	A2	0	0	0	0	497.41	0	266.21	0	94.83	61.78	245.89	0	114.89	0	89.82	0	47.25	0	62.92	50.65	64.85	446.04	39.6	36.69	0	654.22	9.02	85.99	0	0	155.99	2778.01	0	142.33	235.89	0	0	0	54.92	88.28	979.55	71.11	477.5	484.08	55.74	14.52	8405.98	11
O5	A3	0	0	0	0	0	0	0	0	415.85	0	0	0	0	0	0	0	285.73	0	0	170.16	631.28	3204.08	0	250.97	72.82	1672.58	192.49	118.23	224.56	59.93	1517.75	18783.5	1001.12	386.59	842.73	88.26	387.73	3238.94	199.7	293.36	1478.37	1034.03	924.07	856.49	267.06	0	38598.4	11
O5	A4	0	0	0	0	0	160.97	133.5	0	543.23	0	734.49	798.16	1605.54	124.09	65.56	0	293.17	0	0	227.45	0	255.88	0	72.97	58.26	83.52	28.66	322.98	46.57	41.5	407.07	1620.38	79.75	44.99	0	36.36	127.06	179.65	44.29	22.6	345.26	185.08	88.61	183.08	22.91	19.4	9002.99	11
O5	A5	0	0	0	0	105.24	0	0	0	114.01	58.34	91.96	26.07	69.72	0	24.8	0	62.72	82.61	4.86	142.09	197.42	940.83	94.55	218.64	59.15	630.03	60.2	203.17	32.13	51.65	622.17	7842.14	1126.93	379.24	124.82	130.77	1910.72	666.22	195.86	279.56	3230.02	76.44	394.54	627.39	19.29	0	20896.3	11
O5	A6	0	0	0	0	0	0	0	0	0	290.03	498.09	0	1099.35	0	100.09	0	513.58	0	0	0	149.75	1040.07	0	127.87	32.62	1174.24	18.26	78.32	0	55.3	601.87	3805.39	1021.69	1146.67	0	148.67	202.7	262.75	0	0	2551.71	154.57	731.16	701.51	73.81	29.72	16609.8	11
O5	A7	0	0	0	0	0	0	0	0	58.25	0	0	0	53.18	35.66	27.88	0	118.13	0	0	119.06	298.78	1498.56	91.12	237.13	56.89	1850.31	195.58	101.96	137.43	26.91	413.31	13295.3	873.37	474.73	56.7	158.72	410.46	1201.94	91.07	240.18	1426.43	96.93	607.36	301.48	93.26	0	24648.1	11
O5	A8	0	0	0	124.26	31.65	0	0	0	90.28	0	11.71	0	18.5	0	43.94	0	19.61	0	31.63	32.5	178.73	973.86	119.53	69.38	97.56	878.3	0	156.01	0	46.92	506.42	6358.78	590.8	227.17	101.84	124.15	196.42	830.15	78.61	147.8	465.63	117.96	335.88	276.68	91.87	0	13374.5	11
O5	A9	0	0	0	0	0	0	0	0	0	0	285.98	0	409.58	0	258.57	0	5414.93	0	0	759.43	1985.33	2557.04	580.74	486.34	960.19	3050.97	0	565.29	0	0	479.98	13971.1	5742.69	1311.08	910.69	1494.09	1113.3	8063.37	323.19	314.27	4445.26	467.91	1672.35	2479.92	218.8	0	60322.4	11
O5	A10	0	0	0	0	0	0	0	0	0	0	106.44	79.11	211	0	80.55	0	414.14	0	169.01	4775.11	127.93	688.66	105.43	162.42	57.6	548.41	119.92	0	0	0	408.44	4440.36	1405.72	59.94	103.12	225.37	1190.34	679.01	128.7	144.03	3201.39	103.5	492.21	1008.22	48.2	0	21284.3	11
O5	A11	0	0	0	0	0	0	0	0	48.31	0	81.84	0	52.41	0	27.25	0	104.64	0	0	96.87	416.23	3284.3	0	0	82.56	901.96	117.75	131.44	0	129.51	1340	20120.3	664.42	919.27	332.34	715.36	953.31	2177.47	407.21	465.62	1918.12	268.72	936.15	985.39	215.76	0	37894.6	11
O5	A12	0	0	0	0	0	0	0	0	342.22	244.06	108.67	270.57	221.99	264.62	414.53	297.46	540.38	394.92	470.4	2444.38	205.95	2010.66	0	0	159.46	1840.55	252.46	168.97	148.62	561.82	314.68	10927.8	427.64	2770.86	4143.93	586.41	1065.99	2842.58	238.52	367.54	2876.54	242.26	1122.37	1018.3	81.08	0	40389.2	11
O5	A13	0	0	0	0	0	0	0	0	531.95	16.67	39.53	0	0	0	0	15.52	60.67	23.27	5.92	36.06	69.63	102.75	224.64	162.2	145.01	374.85	94.4	42.96	0	70.91	241.28	2593.36	782.31	198.72	0	11652.8	313.46	625.63	36.97	89.2	680.74	59.69	69.28	139.61	132.17	0	19632.2	11
O5	A15	0	0	0	0	0	0	0	0	0	0	0	0	176.94	0	130.79	0	611.86	0	463.01	301.26	2285.74	1039.36	879.16	352.03	221.14	2518.7	111.02	84.63	121.44	740.91	0	6088.05	1630.02	666.19	768.28	1456.41	8140.88	3737.78	861.13	818.62	18362.5	515.07	1736.98	3980.2	61.33	0	58861.4	11
O6	A1	0	0	0	0	0	0	0	0	519.38	0	0	0	0	0	0	0	60	0	0	59.74	23.25	368.39	195.81	137.41	67.15	59.47	74.09	39.8	67.99	37.62	172.72	1779.58	732.16	180.01	109.68	639.14	219.56	415.44	40.7	135.99	358.93	86.81	59.98	75.02	112.95	0	6828.77	11
O6	A2	0	0	0	0	0	0	0	0	89.42	0	0	16.02	85.93	0	0	0	126.66	0	0	131.63	340.64	1336.42	1765.15	125.33	159.75	1100.2	127.55	178.53	83.37	57.49	2077.97	20734.1	362.78	122.28	105.45	4178.28	1539.11	5425.51	114.23	509.83	579.45	34.63	280.06	600.78	205.66	0	42594.2	11
O6	A4	0	0	0	0	0	0	0	0	523.09	13.71	52.19	3.68	0	0	0	0	82.72	8.27	10.48	46.36	71.73	307.24	243.55	133.93	139.62	404.48	60.51	60.95	76.95	46.02	239.48	2867.52	901.39	244.13	118.25	472.16	244.94	833.66	83.25	119.79	508.03	77.22	169.99	62.86	107.44	289.5	9625.09	11
O6	A5	0	0	0	0	0	0	0	0	0	401.78	86.44	0	1378.36	758.56	569.83	0	0	0	0	0	1404.38	2342.25	231.35	132.86	960.15	1711.43	304	133.27	470.67	679.83	1516.17	21527.3	0	0	0	2571.14	833.18	0	1084.7	189.14	1490.6	1670.96	510.1	1226.36	185.08	0	44369.9	11
O6	A6	0	0	0	0	0	0	0	0	28.26	0	0	0	0	0	0	0	614.13	44.67	166.61	336.11	363.18	1030.98	81.02	147.14	202.11	928.37	200.1	64.1	64.89	440.67	2371.47	27947.1	202.94	60.39	118.27	771.71	356.66	682.63	0	59.01	96.25	384.43	256.52	240.7	76.63	303.5	38640.5	11
O6	A7	0	0	0	0	0	0	0	0	77.42	0	0	0	0	0	0	0	758.32	144.23	45.24	459.7	466.24	1831.85	74.63	147.89	274.17	868.52	358.15	407.04	109.42	437.48	2279.42	30899.1	264.49	331.82	234.04	994.02	931.12	1054.98	175.27	751.94	1876.72	166.69	397.81	1108.29	865.64	759.89	49551.6	11
O6	A8	0	0	0	0	0	0	0	0	223.99	0	0	561.31	477.88	0	0	0	0	0	0	0	376.74	2244.51	102.12	128.34	316.45	501.12	187.49	34.2	90.36	144.7	1570.77	0	450.81	180.61	0	431.68	913.58	912.69	147.14	551.55	3221.79	99.02	74.14	427.69	0	2397.5	16768.2	11
O6	A9	0	0	0	0	0	0	0	0	0	0	0	0	0	0	0	0	38.22	0	0	0	35.21	458.54	0	0	100.14	462.49	5.4	25.13	0	18.07	57	2520.62	0	202.65	105.21	64.53	204.7	612.78	0	128.45	494.94	0	261.11	58.89	50.94	123.63	6028.65	11
O6	A10	0	0	0	0	0	0	0	0	329.4	0	0	0	313	0	0	0	361.3	0	0	0	0	1359.64	0	0	70.08	277.87	641.56	0	0	0	845.26	1265.09	13745.3	734.26	518.02	304.5	137.35	0	0	0	232.32	0	0	0	0	126.71	21261.6	11
O6	A11	0	0	0	0	0	0	0	0	414.77	0	21.9	0	12.42	0	97.19	0	52.81	75.43	81.19	170.67	0.93	343.39	866.53	124.33	84.17	269.14	424.21	21.81	44.64	76.19	337.92	3956.23	95.41	32.17	1213.14	257.02	128.31	670.75	20.84	57.49	283.29	92.6	107.99	37.07	139.41	108.41	10719.8	11
O6	A13	0	0	0	0	0	0	0	0	125.56	0	0	0	0	0	0	0	147.38	267.31	0	541.59	769.3	1510.42	113.16	567.46	797.45	1044.91	96.62	142.65	675.05	67.21	463.9	11654.1	596.9	242.23	630.64	1637.72	2954.56	4247.47	443.71	1315.93	647.08	7496.9	3115.75	289.92	160.21	4699.01	47462.1	11
O6	A15	0	0	0	364.4	0	0	0	0	461.83	0	11.38	0	77.45	0	0	0	41.21	0	0	0	17.09	341.38	0	0	104.87	330.43	0	27.77	21.38	16.8	96.11	915.41	927.75	231.41	0	109.42	114.51	0	69.73	50.13	223.46	25.12	233.07	133.31	1.19	82.56	5029.17	11
O7	A1	0	0	0	0	0	0	0	220.15	845.37	0	920.36	0	3168.29	0	3127.69	1167.5	3816.68	0	0	0	0	2299.1	0	348.41	0	0	0	0	0	0	0	9475.38	0	0	0	0	143.04	1182.61	0	0	5796.56	0	934.95	5582.23	0	0	39028.3	11
O7	A2	0	0	0	0	0	0	0	0	0	0	0	0	83.48	0	0	0	0	0	0	193.2	66.23	1537.54	0	160.18	130.06	599.36	36.74	138.72	184.73	306.77	172.91	4585.9	23.06	215.71	97.25	299.52	478.45	1213.08	301.11	68.92	2512.99	224.4	408.83	1351.89	65.65	39.53	15496.2	11
O7	A3	0	0	0	0	0	0	0	0	755.77	0	0	0	34.57	0	0	0	0	0	0	0	0	4397.89	292.74	56.47	611.1	1249.17	140.15	123.34	106.25	169.97	1007.77	12427.8	766.36	256.33	24.61	681.87	1635.44	6194.07	262.28	777.86	9849.45	144.37	1657.46	5614.57	594.85	117.97	49950.4	11
O7	A4	0	0	0	0	0	0	0	0	875.95	105.15	300.11	0	457.65	0	0	0	147.3	74.49	292.73	0	388.96	5003.79	0	388.84	317.71	2331.4	479.74	166.76	0	116.01	663.68	18337.4	441.84	440.33	0	1978.96	300.46	4430.93	268.72	133.12	2328.21	511.87	788.41	3340.23	410.18	0	45820.9	11
O7	A5	0	0	0	0	0	0	0	0	572.61	0	0	0	96.95	0	0	0	198.77	0	0	0	0	1100.38	0	144.4	0	310.93	0	62.86	25.07	154.19	1090	4716.2	597.57	0	0	60.26	237.53	531.17	92.06	538.67	1690.26	158.12	153.72	1032.71	0	0	13564.4	11
O7	A6	0	0	0	0	0	0	0	11.53	0	0	0	0	5.13	6.33	33.4	23.3	67.59	27.38	28.3	106.67	52.46	105.53	0	97.07	0	242.18	88.76	48.79	93.38	38.76	129.67	1212.51	833.91	256.92	119.81	678.65	171.63	991.14	91.78	136.81	562.43	81.35	15.52	100.24	0	0	6458.93	11
O7	A8	0	0	0	0	0	0	0	0	213.79	0	0	0	242.11	0	0	0	904.72	47.99	0	333.95	56.25	2301.69	97.59	107.59	337.73	1007.07	69.52	268.28	161.39	65.67	779.91	11041.6	603.55	107.54	48.4	49.87	1066.07	2027.8	211.8	507.77	2859	202.05	527.75	1648.43	189.73	0	28086.6	11
O7	A9	0	0	0	0	0	0	0	0	528.7	80.77	0	0	0	0	25.28	0	62.23	0	0	43.54	97.92	97.19	257.9	126.72	125.43	326.18	94.93	15.27	48.61	1.64	285.79	2474.93	937.35	223.16	99.43	576.54	95.6	704.8	75.49	0	511.37	67.82	5.79	116.45	340.68	339.53	8787.04	11
O7	A10	0	0	0	0	0	0	0	0	350.55	0	208.03	0	98.69	0	0	0	146.49	0	0	0	0	2833.68	0	133.35	271.78	2048.87	148.5	112.6	221.91	394.36	1101.14	8844.01	4102.88	486.9	0	2772.02	78.33	148.78	109.93	0	2123.2	213.35	958.17	2710.72	346.54	0	30964.8	11
O7	A11	0	0	0	0	0	0	0	0	1022.53	441.93	851.41	663.05	907.21	0	0	0	200.26	76.99	371.81	157.69	143.27	1740.07	22.52	160.92	163.36	891.45	409.39	50.38	286.88	536.65	831.44	6572.26	198.52	0	0	953.49	254.88	1742.7	148.01	126.15	2027.43	292.58	2306.5	80.82	0	0	24632.6	11
O7	A12	0	0	0	0	127.68	0	0	0	141.82	0	0	0	908.48	0	0	0	259.17	0	576.94	0	0	614.62	0	0	291.96	186.96	10.11	100.02	151.13	291.25	472.52	2689.96	954.29	67.95	0	178.56	75.25	47.2	0	964.72	105.25	0	791.31	106.75	791.31	106.75	11012	11
O7	A13	0	0	0	0	0	0	0	0	0	0	0	0	0	0	0	0	1460.95	0	0	0	0	561.14	0	150.62	406.76	739.47	163.9	454.51	0	0	2088.85	1581.83	322.69	102.98	0	731.74	47.04	676.61	632.32	302.15	2616.75	342.4	317.87	1714.12	0	0	15414.7	11
O7	A14	245.96	0	0	0	0	0	0	0	0	0	0	0	0	0	0	0	243.84	0	0	0	0	309.02	124.86	431.28	0	672.85	638.21	0	89.46	16.01	131.97	4781.5	191.17	68.77	73.78	317.33	285.35	1609.33	38.15	58.38	812.64	25.07	175.66	787.3	127.52	62.76	12318.2	11
O7	A15	0	0	0	0	0	0	0	0	0	0	0	0	43.77	0	779.22	0	0	0	0	0	141.39	5279.3	0	398.73	755.29	1380.4	179.38	83.79	142.01	252.78	3359.14	29437.6	662.34	495.5	59.33	3549.49	1525.82	2344.15	104.01	2385.75	6262.65	455.88	4997.08	247.84	297.65	275.79	65896.1	11
O8	A1	0	0	0	0	0	0	0	0	992.06	959.31	928.09	0	759.56	0	0	0	0	0	0	0	642.71	584.23	0	0	550.38	541.81	522.88	0	0	489.22	474.19	469.79	448.35	0	0	441.73	439.17	429.51	417.11	414.05	399.38	390.98	371.29	363.17	352.22	0	12381.2	11
O8	A2	0	0	0	0	0	0	0	0	249.83	0	476.1	0	0	0	0	0	85.4	0	0	586.09	383.36	2509.33	74.3	335.76	0	2330.69	156.23	83.03	135.97	120.5	933.27	18555	579.37	509.73	612.98	349.23	475.78	2626.88	140.33	884.14	2950.43	164.93	910.89	0	0	0	37219.5	11
O8	A3	1117.7	0	0	0	0	0	0	0	1104.03	0	786.89	0	0	0	0	0	1746.33	0	0	0	2251.98	0	0	400.23	207.01	166.64	0	0	0	0	0	604.46	432.67	77.94	585.32	284.71	205.4	655.2	457.43	177.06	337.07	0	294.54	46.65	0	0	11939.3	11
O8	A4	864.95	0	0	0	0	0	0	0	216.23	0	0	0	0	0	0	0	269.93	0	0	733.41	234.63	1249.36	98.51	352.81	26.68	1048.99	36.07	44.09	106.4	47.21	318.41	8133.37	795.39	203.99	0	202.58	228.89	1150	190.45	258.69	562.54	0	27.47	136.07	0	0	17537.1	11
O8	A5	0	0	0	0	0	0	0	0	461.43	0	0	0	0	0	0	0	0	0	0	7.39	49.18	318.51	221.76	123.1	0	207.84	57.72	60.56	83.74	15.5	182.66	2120.69	748.14	56.66	37.99	649.89	305.52	789.14	81.74	165.31	501.1	75.37	161.92	0	0	0	7482.86	11
O8	A6	313.35	0	0	0	0	0	0	0	406.7	0	0	0	0	0	0	0	430.83	0	0	645.53	209.9	642.66	158.01	41.53	141.61	500.85	0	49.58	79.53	98.1	310.48	4240.35	278.44	170.17	84.29	206.5	159.85	390.01	51.59	278.42	603.98	96.01	0	0	0	0	10588.3	11
O8	A7	0	0	0	0	0	0	0	0	1616.44	274.5	385.58	0	0	0	147.78	0	381.95	0	0	546.67	97.2	1399.96	0	228.92	0	2078.82	270.15	0	0	0	679.87	12340.2	178.79	982.38	1158.61	961.64	1234.92	361.39	0	0	4219.68	0	960.18	0	0	0	30505.6	11
O8	A8	0	0	0	0	0	0	0	0	391.04	0	0	0	887.31	0	0	0	187.46	0	0	876.21	281.76	622.04	156.34	97.23	99.98	2240.29	117.07	206.94	114.33	164.45	17.83	2349.02	2036.91	135.77	418.46	144.1	107.84	3335.99	0	383.63	657.2	74.17	491.82	0	0	0	16595.2	11
O8	A9	57.87	0	0	0	0	0	0	0	485.67	0	0	0	30.53	0	0	0	26.02	0	0	341.13	0	488.22	165.6	134.45	140.37	76.42	86.63	11.4	59.43	49.28	206.59	3427.5	773.11	212.55	72.47	618.37	968.08	959.11	0	170.78	298.57	56.19	188.49	0	0	0	10104.8	11
O8	A10	0	0	0	0	0	0	0	0	402.41	578.41	114.51	0	2133.85	0	0	0	364.37	225.35	57.5	1805.78	381.02	881.29	181.3	418.42	173.7	1862.65	0	0	0	0	0	1916.22	85.61	522.31	0	558.06	10.7	3019.36	0	343.21	711.48	75.42	825.71	0	0	0	17648.6	11
O8	A12	0	0	0	0	0	0	0	0	342.93	18.6	62.42	0	0	0	0	0	0	0	0	69.05	2.74	76.34	1145.7	13.53	130.48	891.6	18.26	13.66	72.25	0	104.56	1099.59	37.64	148.62	55.67	319.7	124.61	1898	95.24	464.51	908.8	0	239.41	325.51	0	0	8679.42	11
O8	A15	0	0	0	0	0	0	0	0	675.53	1463.88	299.86	0	165.68	0	89.26	0	131.32	0	0	337.38	56.35	1080.46	0	2551.36	435.82	1259.17	107.69	288	112.74	64.19	1549.09	6997.88	8729.37	384.37	599.32	200.21	179.62	1202.54	142.08	130.75	148.52	302.99	105	133.43	357.98	0	30281.8	11
O9	A1	709.51	0	0	0	0	0	0	170.87	1288.72	1472.93	0	0	14187.5	0	2851.18	0	227.56	133.27	382.93	1746.27	2244.2	3068.24	504.97	712.9	560.64	5596.48	668.92	109.58	172.51	1521.12	794.51	32533.4	829.49	126.68	388.97	1717.73	1668.09	894.86	295.28	4115.04	2953.68	168.56	448.12	1412	897.12	0	87573.8	11
O9	A2	0	0	0	0	0	0	0	0	2102.78	25.19	326.26	0	707.3	809.43	528.37	315	359.87	365.24	229.74	568.85	712.12	1607.67	90.61	151.49	139.76	1129.04	218.29	166.74	59.64	863.82	1355.02	14801.8	483.71	110.43	20.85	154.45	617.59	1567.03	378.87	1604.88	1883.38	156.4	666.08	1685.48	256.3	0	37219.5	11
O9	A3	0	0	0	0	0	0	0	0	0	0	1987.07	0	1411.13	0	0	0	0	0	0	0	0	0	0	0	0	0	0	0	0	0	0	0	0	0	0	0	0	0	0	0	270.27	0	0	485.16	0	0	4153.63	11
O9	A4	0	0	0	0	0	0	0	0	0	0	0	0	372.53	0	191.3	0	83.73	0	0	0	0	2120.66	0	147.06	117.54	546.7	173.83	184.48	50.96	37.46	1202.9	19004.7	463.48	240.25	97.37	190.78	1231.82	1590.19	215	602.02	3504.47	141.37	974.02	2245.88	193.13	0	35923.6	11
O9	A5	0	0	0	0	0	0	0	0	0	0	3053.71	0	376.27	0	85.16	517.57	0	0	0	39.64	1454.62	82.15	105.38	61.38	269.51	1781.41	0	0	107.48	134.55	1804.17	10186.2	558.91	484.16	66.44	778.33	437.78	2500.43	194.32	4743.24	2013.53	226.58	945.88	1553.82	282.35	0	34845	11
O9	A6	0	0	0	0	0	0	0	0	1564.32	1411.37	380.59	603.35	1434.22	0	1526.43	218.31	215.38	374.73	0	586.67	950.71	2226.63	132.99	163.23	280.05	2222.84	253.21	118.5	183.44	1055.35	1039.86	19257.5	674.49	586.38	371.96	167.39	619.62	2693.14	175.07	2350.88	2333.54	153.75	2210.08	759.46	23.05	0	49318.5	11
O9	A7	0	0	0	0	0	0	0	0	623.93	0	0	0	0	0	36.88	0	101.21	0	64.14	1060.68	161.84	5980.66	0	513.34	145.47	4282.98	181.2	0	411.25	195.88	2355.92	34049.7	1648.19	668.75	128.83	578.34	610.16	5499.03	126.88	57.58	695.84	2006.88	906.09	1208.07	604.08	0	64903.8	11
O9	A8	0	0	0	0	0	0	0	0	0	0	0	0	0	0	43.25	0	66.63	0	0	771.96	48.37	2213.89	0	116.03	732.77	499.15	389	256.72	221.45	99.45	3085.4	19420.4	819.35	41.42	0	146.49	2447.48	0	96.67	779.89	692.99	145.62	58.54	95.09	0	0	33288	11
O9	A9	0	0	0	0	0	0	0	0	604.54	629.31	931.39	0	1481.41	0	224.86	0	796.02	198.2	0	668.21	1471.42	2319.41	192.62	113.7	313.69	589.78	1908.17	295.22	287.65	977.88	485.37	22865.6	576.46	128.24	137.54	392.46	198.38	1990.71	148.21	66.48	1508.05	658.46	330.97	622.19	570.82	0	44683.4	12
O9	A10	0	0	0	0	613.26	0	329.62	759.13	936.98	207.19	2063.3	186.23	686.81	350.27	969.6	195.06	145.57	181.1	62.26	304.35	106.5	18.55	30.94	0	0	85.27	0	19.69	0	0	0	83.16	0	0	0	0	23.12	97.86	233.21	32.43	16.67	61.73	0	0	0	0	8799.86	12
O9	A11	0	0	0	0	0	0	0	0	472.73	255.72	131.42	0	368.85	0	142.1	0	94.24	210.74	35.63	193.44	529.33	1421.27	78.12	62.23	182.37	1065.96	86.35	321.38	84.72	766.25	556.48	13116	450.62	333.29	82.04	88.51	318.95	1196.66	110	468.82	900.96	0	0	702.08	86.91	0	24914.2	12
O9	A12	0	0	0	0	0	0	0	0	0	0	0	0	40.47	0	42.89	0	103.05	0	0	60.78	104.25	0	290.24	27.26	47.7	202.7	0	6.66	154.51	60.56	200.23	1034.9	52.71	0	88.42	154.41	20.11	420.11	0	30.48	18.76	241.56	121.63	20.42	249.91	948.74	4743.46	12
O9	A13	0	0	0	0	0	0	0	0	362.96	149.87	221.78	901.68	2496.5	0	626.03	0	265.91	0	0	554.24	777.8	2128.09	99.37	108.58	468.56	876.93	339.34	210.59	48.05	197.13	2269.94	26634.2	565.24	251.57	150.69	1011.74	432.62	679.16	406.57	147.69	1755.67	74.55	718.51	1038.9	692.83	85.55	47748.8	12
O9	A14	0	0	0	0	0	0	0	0	232.83	216.74	316.71	408.47	1621.62	0	1673.92	0	1555.67	746.43	804.36	1291.71	558.31	657.28	97.93	1633.49	348.06	270.02	0	646.99	2198.07	662.11	904.38	2276.99	2778.1	487.2	2418.05	1553.54	4684.67	1114.75	1707.41	450.17	1152.51	803.94	1323.75	2186.21	414.9	0	40197.3	12
O9	A15	0	0	0	0	0	0	0	0	1550.78	1933.36	410.99	605.83	1132.03	1188	528.04	354.13	316.47	105.56	580.16	567.47	668.27	570.63	184.25	143.61	148.23	512.26	298.05	154.28	283.43	573.08	1091.72	8112.19	561.46	0	0	456	1667.06	102.39	52.12	1019.46	605.67	2467.32	674.94	300.32	1169.77	304.33	31393.7	13
O10	A1	0	0	0	0	0	0	0	0	39.81	17.21	21.79	0	60.24	0	0	0	122.77	200.57	37.12	350.62	400.62	692.24	0	200.82	87.69	153.45	504.69	3187.75	220.23	64.1	381.36	3734.86	201.73	141.33	126.88	141.06	465.08	189.18	101.56	238.27	1475.33	50.46	987.32	116.47	58.16	0	14770.8	13
O10	A3	0	183.15	303.56	0	898.18	0	0	0	461	0	89.05	0	0	0	0	0	70.3	126.14	94.24	150.85	68.83	972.45	480.05	91.91	300.62	245.98	0	5678.03	1496.8	151.63	68.38	2079.95	1024.89	437.3	181.12	36.27	120.08	1028.41	98.45	61.06	592.96	34.08	507.18	192.38	60.05	0	18385.3	13
O10	A4	0	0	0	0	0	0	0	25.63	16.23	0	0	0	12.17	0	0	0	46.03	20.1	0	234.89	407.86	469.98	0	113.37	9.52	253.24	67.74	67.67	255.46	156.97	262.83	2668.23	97.8	72.27	16.35	78.34	236.46	270.5	64.42	56.85	1515.49	29.39	1146.67	155.32	62.59	0	8890.37	13
O10	A5	0	0	0	0	0	0	0	0	0	0	0	0	0	0	0	0	117.35	105.23	0	0	0	2369.21	0	0	0	1079.6	0	414.21	250.38	385.32	93.5	770.18	299.38	319.21	0	393.85	0	0	0	0	1648.11	0	1670.11	131.64	0	920.3	10967.6	13
O10	A6	0	159.56	264.47	0	159.56	264.47	0	0	401.63	0	77.59	0	61.25	0	109.9	0	0	0	0	82.11	131.42	847.21	418.23	80.08	261.91	4946.77	1304.03	132.1	0	59.57	1812.08	83.71	380.98	157.79	0	31.6	895.96	44.74	53.19	24.39	516.59	58.79	441.86	167.6	52.32	377.59	14861.1	13
O10	A7	98.42	42.3	0	18.55	72.2	0	0	182.49	193.94	206.37	49.22	134.59	95.81	136.36	114.05	61.51	13.47	16.53	24.16	15.19	373.97	62.63	27.06	19.39	25.5	35.47	17.09	7.39	19.49	2.84	23.42	393.1	106.72	21.17	0	16.97	24.19	17.57	7.69	13.25	47.01	11.47	22.76	76.45	0	0	2847.76	13
O10	A8	445.35	39.25	258.93	0	0	0	0	0	99.9	0	0	0	0	0	0	0	84.03	31.97	389.54	132.59	0	1304.21	135.3	273.66	0	2114.87	0	0	0	0	624.3	7972.28	717.77	0	355	179.47	1103.35	62.42	89.54	29.87	1306.82	0	222.98	0	570.92	0	18544.3	13
O10	A9	0	0	0	0	0	0	0	0	0	0	0	0	0	0	0	0	714.57	818.68	0	0	753.32	527.22	0	0	136.31	614.84	2588.23	2317.79	924.1	452.61	222.14	4700.61	1412.32	904.07	523.74	1827.49	0	0	1300.53	181.43	3147.88	0	2316.47	685.56	0	9154.07	36224	13
O10	A11	0	0	0	151.94	0	0	70.41	0	49.39	0	235.4	0	518.12	846.03	510.77	129.46	101.45	0	0	0	93.66	209.33	0	0	149.3	305.73	0	0	58	42.39	268.5	1296.91	587.3	152.63	92.97	132.1	100.6	259.68	36.44	30.6	502.81	58.76	148.84	0	0	667.77	7807.29	13
O10	A12	0	0	0	309.04	376.5	0	0	0	474.92	0	0	0	97.09	0	0	0	621.95	0	0	164.61	98.66	950.08	0	84.82	227.68	263.24	0	452.57	221.59	117.61	324.69	5507.03	51.1	43.9	81.6	382.4	666.07	322.8	1224.68	168.12	321.5	403.6	3435.33	0	0	131.24	17524.4	13
O10	A13	0	0	0	0	0	0	0	0	106.71	0	0	0	0	0	0	0	96.83	0	0	118.15	407.28	1576.09	0	118.24	1302.77	0	189.99	116.53	89.67	117.49	510.9	10444.6	0	0	0	0	1317.68	573.15	0	0	858.46	1049.44	84.49	0	0	0	19078.5	13
O10	A14	0	0	0	0	0	0	0	0	173.14	0	0	0	0	0	0	0	85.4	103.24	0	219.24	0	221.42	31.29	55.61	0	73.95	167.82	457.39	224.15	94.3	82.27	1061.41	250.66	0	0	149.23	110.2	321.64	49.88	195.19	621.49	0	295	0	0	566.72	5610.64	13
O10	A15	258.1	48.84	0	0	0	0	0	0	33.83	0	25.52	0	16.7	0	0	0	31.74	0	0	41.18	54.94	324.08	365.04	287.05	0	52.27	0	70.75	24.79	366.9	471.75	3164.45	848.33	500.04	1023.81	16.12	493.46	302.35	833.06	215.27	465.83	0	465.83	5.99	18.42	253.49	11079.9	13
O11	A1	0	0	0	0	0	0	0	0	415.43	0	63.95	0	0	0	0	0	479.57	628.16	0	0	561.28	634.72	0	62.64	264.46	503.01	195.81	3912.93	1724.68	561.95	1808.04	6531.68	849.86	187.3	0	842.43	1503.23	1812.84	370.9	923.47	8223.51	287.65	2977.38	292.38	65.33	9153.66	45838.2	13
O11	A2	0	0	0	0	0	0	0	0	263.15	456.16	316.49	0	417.63	0	162.93	0	707.4	163.75	0	1007.29	1180.53	320.66	0	730.56	548.77	2076.91	259.94	2438.73	634.01	305.69	1341.96	13508.5	508.88	260.07	0	799.89	1249	4046.48	242.52	120.33	3679.56	204.58	877.54	1760.6	341.14	1814.78	42746.4	13
O11	A3	0	0	0	0	0	0	0	247.97	150	139.5	807.26	239.07	1109.25	395.79	593.88	0	672.22	691.83	945.13	488.86	262.73	257.56	0	205.23	32.38	56.21	70.64	94.87	0	41.59	183.34	527.17	276.55	145.69	174.53	219.34	126.22	360.64	282.89	267.5	649.6	95.77	324.74	87.62	208.66	945.61	12377.8	13
O11	A4	0	0	0	0	0	0	0	841.4	767.44	1144.28	1224.48	1049.38	1509.52	739.28	916.52	0	2860.04	0	0	0	5714.33	1780.32	0	857.77	875.31	950.43	0	16079.3	3297.84	1102.43	985.42	6375.79	827.02	501.38	268.79	613.94	280.07	1446.62	724.01	336.33	2380.18	445.97	3358.06	174.36	212.55	1647.21	62287.8	13
O11	A5	0	0	0	0	0	0	0	0	601.3	0	0	0	675.78	0	612.77	0	1102.29	0	0	0	110.07	1544.42	0	0	0	329.68	0	7887.22	1103.69	497.1	482.47	783.45	266.92	376.5	388.93	292.2	212.37	134.06	396.34	624.69	277.46	226.61	442.49	368.74	483.11	393.06	20613.7	13
O11	A6	0	0	0	0	0	0	0	0	212.57	0	0	0	162.33	146.5	137.33	216.89	726.9	105.11	152.11	390.06	1152.13	1959.53	27.41	181.24	123.36	1229.51	136.57	148.74	1068.2	1321.19	16732.4	0	461.33	181.35	135.74	171.24	887.9	1763.1	173.71	602.35	3221.49	161.91	1941.83	238.97	42.01	3086.79	39399.8	13
O11	A7	0	0	0	0	0	0	462	0	687.91	0	819.35	0	908.39	0	466.09	0	1529.43	0	797.13	2263.89	1364.63	1528.75	618.18	261.19	1102.53	6453.21	2441.49	575.82	406.22	0	0	10623.4	483.13	848.77	290.26	157.34	625.59	3174.66	10.8	520.42	1466.77	287.01	1258.39	678.41	617.46	3107.02	46835.6	13
O11	A8	0	0	0	0	0	0	0	372.33	0	0	0	0	0	0	0	0	744.69	122.12	0	357.95	486.29	2557.03	0	291.65	324.35	1083.46	102.31	180.52	408.56	156.45	1142.88	26836	728.2	473.97	162.52	682.07	1382.7	1920.86	168.99	599.76	3103.59	145.58	1085.58	375.06	0	7010.19	53005.7	13
O11	A9	0	0	0	0	0	0	0	0	108.67	0	0	0	11.1	0	0	0	113.46	0	0	154.39	340.77	0	0	40.3	67.42	325.27	0	0	0	0	254.16	1823.97	65.07	98.31	0	33.91	111.74	305.56	40.52	101.08	425.63	36.68	437.69	0	0	61.49	4957.19	13
O11	A10	0	0	0	0	0	0	0	0	0	0	0	0	0	0	0	0	422.07	0	0	0	0	441.98	0	142.45	0	100.38	0	0	0	143.13	105.67	2750.01	3265.86	196.23	194.63	221.71	206.15	752.99	117.91	154.95	827.04	93.7	985.26	0	0	2246.1	13368.2	13
O11	A11	0	0	0	0	0	0	0	0	57.52	78.68	43.44	347.52	137.89	40.72	0	111.11	397.79	0	0	246.05	264.32	612.3	0	117.06	156.43	1333.66	0	746.92	252.57	159	47.99	3860.53	353.47	100.33	41.8	191.91	404.83	1355.14	113.56	70.3	887.7	443.63	843.48	208.55	93.55	1944.1	16063.8	13
O11	A12	0	0	0	0	0	0	0	28.23	488.2	23.79	12.38	44.5	64.88	29.73	12.08	144.32	3.16	36.34	15.27	138.1	75.56	83.95	182.91	68.55	130.41	348.78	67.69	766.75	329.17	59.51	146.64	1163.77	858.95	204	104.72	590.32	126.94	798.9	25.52	121.67	36.96	41.41	142.52	231.81	81.68	331.35	8161.42	13
O11	A13	0	0	0	0	0	0	0	0	0	173.09	126.83	27.97	105.56	158.22	89.62	247.48	174.35	0	141.59	744.4	648.41	1815.26	0	0	186.56	163.78	78.53	4319.14	1336.48	71.76	511.54	11298.7	481.13	333	84.63	85.76	356.68	3832	21.43	595.82	1395.59	241.6	1346.49	509.73	248.73	1421.39	33373.3	13
O11	A15	0	0	0	0	0	0	0	204.9	164.45	0	0	0	196.22	280.8	163.67	789.59	102.45	0	0	0	738.91	552.02	0	0	1816.12	0	0	0	0	0	0	891.19	74.16	1912.06	0	901.47	452.38	770.01	128.69	88.55	3317.64	95.09	3109.83	0	126.61	1023.04	17899.8	13
O12	A1	0	0	0	0	0	0	0	0	99.76	0	130.8	0	0	0	0	0	0	0	0	139.35	45.79	994.72	0	423.53	0	1729.14	0	0	0	0	653.62	9397.97	106.87	0	0	88.76	694.02	160.38	70.95	241.28	1083.7	56.25	568.1	0	0	0	16685	13
O12	A2	365.86	0	0	0	0	0	0	0	0	0	0	0	0	0	0	0	151.13	0	593.9	115.13	126.59	313.28	0	738.81	0	3122.37	0	631.38	291.34	731.42	575.95	7133.45	3522.91	496.32	986.4	698.09	671.67	1607.04	0	290.7	2691.37	0	548.68	0	0	6328.05	32731.8	13
O12	A3	0	0	0	0	56.78	9.48	21.3	0	18532.3	0	0	0	0	0.38	136.23	96.17	33.75	0	0	0	0	462.46	0	0	175.16	531.35	0	64.54	0	60.92	295.9	4059.81	934.4	241.38	0	682.51	330.61	1009.12	89.32	0	603.19	0	265.09	0	0	345.45	29037.6	13
O12	A4	0	0	0	0	0	0	0	0	0	0	0	0	0	0	0	0	86.66	45.65	23.76	240.52	405.94	1077.74	0	0	400.49	451.03	608.47	105.25	0	137.11	646.63	9003.26	387.13	252.62	121.4	564.9	39.74	312.31	94.64	27.03	245.28	622.93	20.65	627.39	0	35.06	16583.6	13
O12	A5	0	0	0	0	0	0	0	0	0	0	46.79	0	0	0	105.85	105.22	175.94	0	0	2315.73	232.38	2216.2	112.87	18638.8	0	1551.1	162.17	145.35	266.81	310.74	483.08	14584.4	6139.64	139.44	907.64	432.92	36.53	1559.27	472.83	256.33	1234.41	199.14	676.31	209.56	979.27	432.87	55129.6	13
O12	A7	92.73	0	69.79	0	0	0	0	0	498.2	0	0	0	0	0	2.85	0	49.28	0	0	39.47	33.09	135.62	178.28	149.84	0	294.65	74.04	44.81	87.67	2.52	276.34	1271.57	884.47	173.3	122.37	607.91	238.05	610.28	76.15	142.39	230.08	38.22	109.25	0	0	1.94	6535.16	13
O12	A8	0	0	0	0	0	0	0	39.74	495.19	18.34	0	0	9.41	0	0	0	2.07	0	27.05	63.83	55.23	301.59	0	162.88	9.32	419.59	91.05	45.15	98.46	33.47	215.43	2561.45	856.19	157.71	32.03	478.47	303.65	607.83	68.98	107.63	448.75	65.89	175.92	118.07	0	83.46	8153.83	13
O12	A9	0	0	0	0	0	0	0	0	468.52	0	0	0	0	0	0	0	14.67	0	0	34.81	91.02	147.22	5952.28	1529.58	385.24	471.11	60.42	65.1	79.72	72.16	18.91	991.88	563.95	25.3	30.6	634.13	248.58	265.25	22.7	118.11	308.76	77.21	174.25	0	132.48	105.8	13089.8	13
O12	A10	0	0	0	0	0	0	0	0	0	0	0	0	0	0	0	0	14.73	0	0	24.54	43.36	125.32	0	0	83.55	377.82	124.98	20.99	19.58	11.65	53.16	1571.04	749.25	112.53	77.86	468.11	319.44	933.02	50.81	0	90.74	16.4	220.13	283.68	72.45	318.44	6183.58	13
O12	A11	741.54	0	0	0	0	0	0	0	0	0	0	0	301.89	0	0	0	878.14	0	0	617.9	222	1558.17	134.25	234.9	0	2690.8	0	303.48	0	0	758.75	14128.1	399.81	456.23	0	853.03	837.47	1925.63	130.79	388.14	6497.66	155.41	827.26	0	0	5433.55	40474.9	13
O12	A12	0	0	0	0	0	0	0	0	31.37	0	0	0	0	0	0	0	32.59	29.97	33.48	309.08	19.09	969.39	0	137.94	83.86	668.22	328.85	4135.05	121.8	128.52	64.1	104.06	1120.09	238.64	9.55	161.68	6270.36	72.51	291.65	140.26	1743.99	86.12	1451.11	34.93	19.66	0	18837.9	13
O12	A13	0	0	0	0	0	0	0	0	466.95	10.61	52.3	4.18	0	0	11.3	0.06	19.3	0	23.59	23.43	111.31	154.88	0	101.01	133.42	52.22	95.3	65.17	87	19.29	227.54	1735.13	886.49	190.76	880.81	185.41	3769.68	952.48	152.72	27.31	1293.49	33.26	1072.06	82.19	113.61	471.11	13505.4	13
O12	A14	0	0	0	0	0	0	0	0	530.11	0	105.95	0	44.19	125.88	0	0	136.94	0	0	581.13	132.63	1240.95	0	361.3	0	1614.95	55.52	669.97	0	0	52.14	9224.2	180.07	93.44	0	505.65	195.31	906.29	149.23	1313.18	76.61	89.34	447.49	0	0	0	18832.5	13
O12	A15	0	0	0	0	0	0	0	0	189.85	199.48	134.73	0	42.5	0	0	0	0	0	0	321.61	198.45	332.5	49.12	455.13	170.56	377.87	0	695.98	321.61	198.45	372.64	626.88	1136.43	165.32	135.73	533.56	151.43	1432.03	179.64	281.54	1739.77	118.51	3225.7	0	0	3604.28	17391.3	13
O13	A1	0	0	0	0	0	0	0	0	68.44	0	0	0	113.51	0	52.77	0	22.81	0	0	235.7	135.3	959.36	0	218.31	421.93	715.05	63.45	537.44	212.99	30.19	263.66	4764.8	211.69	111.07	132.59	95.3	636.78	1910.46	135.68	143.85	3167.4	73.44	1777.95	119.13	53.29	119.22	17503.6	13
O13	A2	0	0	0	0	0	0	0	0	214.07	0	308.72	0	0	0	0	0	179.7	0	0	405	381.41	1764.64	68.64	133.19	0	859.02	437.65	2043.29	1171.46	168.03	695.99	11929.2	373.83	419.88	98.57	144.86	1385.95	386.1	639.89	484.15	4435.3	121.38	2430.88	265.96	117.59	173.16	32237.5	14
O13	A3	0	0	0	0	0	0	0	0	0	0	304.41	0	0	0	0	0	64.38	68.75	43.52	317.43	305.18	1198.59	35.84	57.39	199.15	933.04	926.52	70.81	103.04	200.44	311.72	5574.6	112.94	540.01	1102.41	33.38	79.56	1540.38	165.57	264.8	1845.11	154.63	778.53	122.28	25.3	1021.88	18501.6	14
O13	A4	0	0	0	0	531.94	0	0	50.9	314.07	1190.19	406.43	245.86	601.31	0	537.63	94.93	469.31	207.12	190.6	821.27	308.27	891.64	837.17	152.84	146.75	494.84	123.13	354.24	69.73	95.83	487.87	3947.94	252.91	74.56	130.22	214.3	531.86	201.22	243.71	350.81	3023.16	135.86	2071.07	0	0	278.09	21079.6	14
O13	A5	0	0	0	0	0	0	0	0	0	0	188.15	96.32	73.63	0	0	0	126.14	0	99.15	350.61	306.26	1256.35	75.96	251.06	140.43	1241.64	211.72	1063.64	841.21	61.86	312.14	7934.57	159.84	165.16	686.32	276.99	293.89	691.81	1681.21	427.08	205.57	695.24	132.08	164.96	0	0	20211	14
O13	A6	0	0	0	0	0	0	0	0	93.76	87.04	31.67	0	0	0	132.42	0	142.38	0	95.79	466.03	558.4	1702.02	81.86	232	112.75	753.38	951.98	141.92	1251.93	620.08	646.31	11929.5	868.27	273.04	74.03	406.97	535.19	905.35	130.67	323.24	1643.86	128.39	1035.45	165.5	71.36	82.13	26674.7	14
O13	A7	0	0	0	0	0	0	0	0	903.77	0	0	0	0	0	0	0	0	0	0	1135.39	3369.11	6270.61	0	492.44	1662.54	5021.91	76.84	558.68	185.53	477.34	2125.61	55445.4	3690.29	246.51	74.08	655.38	2661.5	266.06	357.37	1008.09	1514.33	732.5	4160.95	0	537.75	4401.75	98031.8	14
O13	A8	2308.18	0	0	0	0	0	0	0	449.28	0	2125.03	0	581.78	252.39	127.32	0	2265.73	0	0	620.25	333.99	0	0	5918.94	2060.03	767.4	1424.79	930.59	689.3	648.69	1371.09	27280.7	37741.7	1268.69	685.27	656.67	914.18	1395.65	1018.04	751.33	1563.03	344.58	1067.55	982.33	0	1042.14	99586.6	14
O13	A9	3887.53	175.54	76.58	0	117.19	0	0	126.7	25137.6	0	28.48	0	0	0	34.01	0	35.69	0	0	0	0	295.62	119.83	318.38	0	603.34	136.04	71.63	69.08	125.32	89.79	3375.77	79.72	665.78	30.55	301.19	419.94	682.83	47.97	135.75	1925.55	17.12	115.79	0	214.71	772.6	40233.6	14
O13	A10	0	1331.69	0	0	619.32	0	0	0	51.01	80.02	322.89	490.98	342.11	201.58	258.14	0	395.55	45.9	34.24	209.25	241.66	196.78	731.07	0	158.52	332.72	71.89	132.91	197.59	135.4	567.26	3756.57	453.29	0	0	0	368.94	432.35	84.74	79.82	1374.29	73.71	919.6	95.63	0	0	14787.4	14
O13	A12	0	0	0	0	0	0	0	0	55.75	26.74	87.85	146.98	163.9	0	178.55	108.28	140.94	195.29	89.96	763.52	700.61	1398.21	167.87	1460.21	62.24	150.22	1073.05	162.67	0	76.56	67.46	4916.23	145.69	391.57	334.82	315.75	515.97	2712.39	195.05	128.19	2135.84	81.74	1277.24	167.12	138.47	0	20732.9	14
O13	A13	0	0	0	0	0	0	0	0	0	0	20.7	25.59	77.83	42.37	9.89	10.14	19.97	0	0	170.5	132.82	893.59	39.49	64.4	60.97	291.95	502.64	51.55	456.36	281.05	238.67	5466.04	167.16	109.92	33.1	483.23	311.09	2008.89	72.48	191.95	1084.74	43.32	743.52	85.64	36.3	61.88	14289.7	14
O13	A14	0	0	0	0	0	0	0	0	350.05	0	0	0	0	0	0	0	93.65	0	0	69.33	262.26	1907.87	76.64	198.8	174.5	1923.05	0	0	132.41	360.39	196.03	4019.8	168.7	214.47	77.23	514.54	1252.91	5753.16	272.1	470.04	10911.8	490.66	2246.34	6749.21	0	0	38886	14
O13	A15	0	0	0	0	0	0	0	0	23.3	17.22	62.42	63.73	152.43	0	125.97	0	56.3	0	278.61	440.87	495.54	474.59	150.23	466.9	31.26	516.7	590.4	493.59	28.01	107.99	168.41	4571.78	453.54	295.41	549.58	1293.2	611.12	297.6	327.84	505	4620.68	53.77	3351.87	160.34	0	0	21836.2	15
O14	A1	0	0	0	0	0	0	0	0	117.33	0	183.88	0	243.68	0	0	0	738.13	0	146.3	0	0	3992.7	547.13	175.39	207.24	59.58	107.48	415.54	182.9	258.89	1286.82	21661.4	135.44	1739.12	441.28	102.47	761.28	5999.96	113.08	196.65	5435.59	350.78	4209.47	409.97	100.01	2268.54	52588	15
O14	A2	0	0	0	0	0	0	0	0	0	0	0	0	0	0	0	0	3122.39	0	0	3057.22	0	0	0	0	1309.28	1216.6	1443.77	7369.75	0	0	0	4727.71	1275.22	945.09	719.79	1083.02	607.18	1583.54	1081.48	3031.59	2209.17	679.54	1188.26	409.5	0	1434.51	38494.6	15
O14	A3	0	0	0	0	0	0	0	0	323.61	0	256.84	0	432.46	0	197.49	281.43	226.07	0	201.55	159.18	191.25	386.31	0	76.67	181.79	215.53	0	0	0	0	132.43	394.21	0	0	0	0	178.73	148.89	0	0	284.65	0	265.11	0	0	0	4534.2	15
O14	A4	0	0	0	0	0	0	0	0	590.31	0	599.14	0	834.77	0	740.25	0	515.59	0	0	335.46	934.51	560.29	0	373.02	319.34	894.66	764.61	833.96	215.2	117.47	128.69	4272.71	508.49	2107.16	398.11	516.9	1051.19	1142.55	383.61	1110.76	2441.12	670.35	3869.27	0	0	1067.8	28297.3	15
O14	A5	0	0	0	0	0	0	0	329.69	279.36	504.86	524.38	463.45	618.74	506.1	543.76	0	0	1100.53	623.45	1500.76	782.43	2581.64	528.67	715.77	579.59	2116.2	5286.06	1689.44	108.22	625.52	270.86	11140.6	1534.99	673.51	301.31	67.27	954.08	335.99	513.51	1690.21	3421.86	193.13	4814.3	227.26	298.33	1717.26	50163.1	15
O14	A6	0	0	0	0	0	0	0	0	0	0	0	0	0	0	0	0	32.85	0	0	223.58	38.16	1256.46	0	51.31	256.64	275.62	134.17	57.31	133.26	115.92	2439.64	7810.65	219.48	141.75	0	107.1	371.15	1971.64	211.39	167.22	6318.68	66.67	3143.72	0	303.92	0	25848.3	15
O14	A7	0	0	0	0	0	0	0	0	0	0	0	0	0	0	0	0	119.02	0	64.23	0	853.18	1468.84	113.64	282.05	0	2429.53	434.21	288.79	201.26	229.06	272.93	7759.43	520.29	386.18	0	886.06	3808.83	396.31	173.7	244.62	4938.37	151.71	7792.17	577.69	0	2141.54	36533.6	15
O14	A8	0	0	0	0	0	0	0	455.47	412.86	0	441.27	0	1070.87	0	0	0	637.19	0	380.51	881.69	1024.46	1726.01	320.38	282.01	1496.46	5852.63	300.07	1581.12	474.45	186.67	331.18	7163.52	1514.2	414.98	205.17	129.42	500.35	5984.36	819.58	174.87	1245.84	106.67	1056.14	139.67	68.3	1042.93	38421.3	16
O14	A9	0	0	0	0	0	0	0	300.16	268.13	0	1422.94	0	2209.79	0	2243.48	0	2019.06	1160.25	317.04	338.61	828.34	476.88	128.84	311.97	181.34	103.9	137.42	301.84	98.68	112.06	215.89	880.19	405.65	165.88	851.38	533.63	157.35	254.1	52.89	99.17	1209.14	239.39	623.01	129.11	199.68	0	18977.2	17
O14	A10	0	0	0	0	0	0	0	34.87	26.51	358.04	47.13	246.05	153.18	352.26	279.28	320.45	3857.01	0	93.31	0	1213.68	1096.4	340.23	94.64	115.07	165.85	339.44	100.15	113.79	337.24	239.93	5047.84	65.55	249.73	9.68	27.07	247.93	1231.37	62.36	773.7	304.68	248.85	822.82	58.52	86.73	266.15	19427.5	17
O14	A11	0	0	0	0	0	0	0	0	60.83	0	88.29	0	71.38	0	0	0	134.64	0	0	315.86	311.34	2630.11	34.54	246.7	1234.39	12170.1	373.89	362.81	179.28	112.49	1578.82	25716.7	745	325.22	261.15	310.91	835.11	853.28	297.12	404.07	4721.77	115.85	3571.65	370.57	221.18	4696.1	63351.1	17
O14	A12	0	0	0	0	0	0	0	0	0	0	0	0	0	0	0	0	284.25	0	293.38	205.05	491.07	901.71	0	0	1032.13	1442.7	1109.13	163.29	285.06	442.08	1141.36	10850.5	650.02	967.47	139.52	175.67	413.99	3142.57	279.09	821.4	2195.3	147.88	2849.6	354.32	160.93	3010.76	33950.2	18
O14	A13	0	0	0	0	0	0	0	258.47	297.06	129.7	234.15	181.85	132.31	155.31	168.04	192.14	306.05	0	0	153.72	277.97	57.17	809.09	197.96	566.17	822.52	0	0	0	200.85	347.27	2131.26	2378.55	529.26	286.18	129.02	160.17	3014.97	167.81	431.74	993.37	99.75	1067.68	113.26	318.27	662	17971.1	18
O14	A14	0	0	0	0	0	0	0	0	0	0	0	0	0	0	207.04	0	902.58	0	0	289.8	1278.49	0	0	0	767.17	594.67	700.46	1383.56	0	0	379.87	5184.3	736.61	1501.46	0	530.52	411.08	1663.85	1253.67	1509.97	1695.21	0	952.19	0	0	520.85	22463.4	18
O14	A15	0	0	0	0	0	0	0	0	0	0	423.08	0	873.83	0	767.42	0	444.37	0	227.45	543.98	970.38	874.65	515.33	286.66	765.12	2052.93	259.63	887.33	307.24	546.28	132.61	2306.02	826.53	139.04	0	530.52	576.74	4755.7	356.26	1371.53	1656.06	195.77	3526.42	0	0	1106.34	28225.2	18
O15	A1	0	0	0	0	0	0	0	0	1139.78	0	357.87	0	0	0	0	0	0	0	0	0	0	916.45	2742.45	203.48	392.75	1274.73	0	337.46	1090.33	170.03	643.47	5501.83	934.4	3847.72	411.89	618.54	1078.21	2487.26	210.09	325.67	2464.49	240.01	1730.42	528.73	0	1002.67	30650.7	18
O15	A2	0	0	0	0	0	0	0	0	0	0	0	0	0	0	0	0	365.34	0	31.27	0	2060.94	4301.08	0	256.18	221.65	2511.34	287.8	185.14	62.76	857.87	4082.07	49361.8	1077.63	311.3	508.01	1661.68	1174.8	4733.16	0	1079.51	5097.74	235.61	3580.91	1430.63	191.86	15516.4	101184	18
O15	A3	0	0	0	0	0	0	0	180.4	263.2	275.9	0	0	0	0	391.25	0	4048.06	0	0	671.97	70.74	433.29	0	496.25	504.29	199.59	127.91	171.67	89.99	145.2	243.05	512.67	292.01	588.27	141.22	282.55	551.38	211.93	91.09	196.36	723.69	138.29	997.32	148.47	138.98	509.65	13836.6	18
O15	A4	0	0	0	0	559.72	0	0	0	242.33	1627.32	331.62	0	1472.97	0	1356.83	0	1821.58	0	0	0	0	323.67	0	177.84	151.2	356.24	280.29	373.3	172.54	158.88	110.15	700.06	114.19	571.75	186.13	557.38	159.14	936.72	328.04	564	2897.29	252.38	2154.8	0	0	772.45	19710.8	18
O15	A5	389.68	204.2	0	0	0	0	0	0	704.47	0	464.42	0	0	0	0	0	145.07	0	0	715.09	623	6032.48	90.99	393.12	464.38	3009.7	350.23	229.36	186.7	97.81	2876.86	36459.8	1317.8	594.84	1568.21	602.19	4593.28	2407.79	229.8	630.02	1768.07	207.58	1677.76	0	74.05	0	69108.8	18
O15	A6	0	0	0	0	0	0	0	832.92	917.71	448.05	811.41	751.25	1020.59	998.11	984.44	448.53	3764.9	0	1595.97	597.57	1909.97	1246.01	0	1014.64	1035.12	347	19600.7	2831.53	204.51	267.65	475.26	2146.36	656.39	427.88	84.59	344.06	295.74	276.68	201.51	287.03	1385.26	578.44	1088.67	348.04	0	509.76	50734.3	19
O15	A7	0	0	0	0	0	0	0	0	588.38	0	0	0	0	0	0	0	1347.6	0	0	0	0	377.49	0	0	2833.53	3720.93	0	0	0	0	0	1626.9	1190.08	192.42	548.78	759.7	698.14	327.03	684.3	123.25	913.12	472.56	529.97	0	0	382	17316.2	19
O15	A8	0	0	0	0	249.77	0	0	58.92	165.81	0	199.47	0	0	0	555.55	0	663.49	0	0	0	619.55	2801.45	17.16	234.97	133.58	700.56	170.85	88.73	15.65	53.34	2786.7	8821.48	2191.78	0	268.95	1463.39	76.85	120.06	74.59	0	570.82	185.55	577.95	296.06	131.23	721.06	25015.3	19
O15	A10	0	0	0	0	0	0	0	0	410.68	283.42	461.79	0	379.04	0	815.62	0	1243.25	0	0	0	0	532.33	164.1	286.78	2624.64	6219.93	1017.8	380.18	185.05	375.43	134.8	1790.27	207.41	462.3	149.85	55.66	180.1	912.84	184.1	216.72	529.97	235.01	430.16	0	0	576.73	21446	20
O15	A11	0	0	0	0	0	0	0	0	151.77	0	0	0	450.87	0	160.94	0	831.24	0	949.85	444.55	1935.8	793.06	0	61.58	204.52	215.78	148.06	257.39	0	44.75	617.44	2934.8	186.35	365.5	181.66	280.68	68.83	134.86	179.69	382.87	307.5	58.6	211.56	166.93	0	0	12727.4	20
O15	A12	0	0	0	0	0	0	0	174.51	285.54	330.34	499.88	0	686.01	0	0	0	215.95	0	0	0	480.32	4354.03	23.15	300.69	96.6	909.11	297.63	80.7	177.09	388.81	3282.79	25675.5	38.3	87.75	517.88	2449.44	181.23	3071.76	340.9	1286.06	3082.18	293.22	1235.47	0	0	0	50842.8	21
O15	A13	0	0	0	0	0	0	0	0	0	0	166.44	0	136.1	0	320.5	0	95.91	0	143.32	245.32	163.76	1270.26	0	0	485.81	1593.05	111.71	181.07	235.44	372.91	1085.36	5780.93	792.33	228.63	206.37	277.12	106.08	1356.73	236.94	471.07	2032.81	318.42	1439.28	268.73	149.15	0	20271.5	21
O15	A14	0	0	0	0	0	0	0	0	394.25	0	0	0	0	0	60.51	0	142.9	0	0	251.11	0	14.94	128.78	39.17	63.01	393.13	339.31	267.31	32.23	85.83	80.16	2673.6	837.9	112.99	95.48	665.93	227.26	299.22	66.63	96.61	427.11	22.75	130.39	56.21	98.07	239.31	8342.1	21
O15	A15	0	0	0	0	0	0	0	149.4	345.65	139.98	67.09	129.97	148.9	255.6	300.89	341.56	103.75	487.87	305.81	309.27	436.02	258.01	124.17	279.37	82.74	658.25	300.13	95.55	34.62	91.22	64.55	3171.73	839.79	221.7	87.84	624.38	297.23	924.93	12.2	145.82	266.42	11.51	141.13	29.37	87.16	275.56	12647.1	21
O16	A1	0	0	0	0	0	0	0	0	0	0	0	0	0	0	0	0	52.8	10.91	18.39	62.85	49.92	153.93	0	108.87	150.03	277.16	96.63	65.97	90.46	36.45	180.22	1968.08	732.3	156.79	131.94	635.9	209.8	25.09	62.06	131.03	75.82	12.75	144.78	95.2	129.46	0	5865.59	21
O16	A2	0	0	0	0	0	0	0	0	0	0	0	0	0	0	0	0	0	0	0	145.07	42.29	2318.91	0	211.52	348.83	2177.39	120.43	92.46	0	0	238.77	3883.27	103.6	773.92	383.49	57.61	323.25	8264.47	140.66	170.37	2738.67	335.24	2553.66	0	0	0	25423.9	21
O16	A3	0	0	0	0	0	0	0	83.14	70.14	0	0	0	0	0	0	0	148.33	0	181.21	584.68	137.95	1070.17	0	0	125.14	719.61	98.5	0	103.2	82.12	242.98	310.01	105.36	686.02	173.99	63.89	847.34	1067.99	132.62	424.98	980.6	33.56	882.44	226.56	81.59	0	9664.12	21
O16	A4	0	0	0	0	0	0	0	0	207.18	0	0	0	0	0	0	0	413.23	0	533.23	457.85	842.76	5019.42	349.04	395.71	265.35	3808.43	204.95	1446.16	905.24	150.18	1622.55	29838.4	2928.04	365.41	114.76	569.41	881.22	8063.7	450.97	202.87	2296.2	188.11	1027.75	649.16	207.67	0	64405	22
O16	A5	0	0	0	0	0	0	0	33.4	0	0	0	0	0	0	0	0	22.39	0	0	21.01	44.24	157.55	244.36	96.51	64.26	84.47	10.36	140.44	100.97	45.77	57.99	779.47	723.49	218.87	138.46	378.21	257.11	663.92	64.51	135.85	340.93	77.4	124.46	95	117.74	0	5239.14	22
O16	A6	0	0	0	0	739.29	114.48	86.46	81.86	766.54	77.64	113.64	126.63	217.49	181.2	244.38	0	395.71	58.4	604.26	262.37	1790.49	144.76	0	110.58	303.77	1262.97	0	147.9	225.9	424.5	1230.79	12847.3	173.36	0	0	1286.61	319.67	301.89	613.19	164	1471.94	367.11	1461.9	281.14	0	0	29000.1	22
O16	A8	0	0	0	0	0	0	0	0	181.78	0	0	0	0	0	0	0	101.71	0	71.19	520.23	247.11	2570.04	210.33	573.73	0	2033.06	153.17	0	69.83	162.48	842.23	19371.5	392.87	350.3	223.24	787.05	323.17	1708.61	406.61	578.99	1155.88	469.46	844.95	0	405.94	0	34755.4	22
O16	A9	0	0	0	0	0	0	0	0	371.77	0	0	0	0	0	0	0	14.52	0	0	50.75	117.36	7236.64	119.29	387.59	307.76	519.95	75.03	8.77	1868.39	71.82	257.82	4213.11	321.48	178.32	102.9	632.73	68.44	990.94	73.38	120.25	572.25	70.71	195.47	126.68	94.56	0	19168.7	22
O16	A10	0	0	0	0	0	0	0	0	654.19	0	0	0	0	0	1276.84	0	787.05	0	381.49	1416.05	453.64	963.48	399.82	564.75	131.88	1078.55	111.81	61.23	151.17	194.04	533.38	13830.5	610.26	157.09	1024.48	1100.08	1190.54	1458.55	1528.02	756.76	1604.32	0	142.33	0	0	205.17	32767.5	22
O16	A11	0	0	0	0	0	0	0	0	473.71	0	0	0	0	0	0	0	0	0	0	39.15	31.52	351.61	0	103.16	133.79	337.07	2.12	33.75	83.78	99.07	231.85	3744.99	276.34	0	0	401.02	245.77	461.75	61.17	124.56	190.32	51.17	234.74	0	0	0	7712.41	22
O16	A12	0	0	0	0	0	0	0	29.8	268.89	0	0	0	0	0	0	0	226.55	0	0	386.44	436.87	2587.61	0	118.57	819.72	698.38	229.29	136.81	255.63	83.38	1397.64	17260.2	1141.64	176.82	281.87	390.49	1161.85	157.81	62.84	947.8	58.68	57.62	83.79	0	0	0	29456.9	22
O16	A14	0	0	0	0	0	0	0	0	953.58	0	353.54	0	0	0	0	0	675.3	0	0	0	0	1957.27	334.91	331.91	949.33	2200.53	423.02	247.06	750.37	0	7327.14	7772.61	578.93	1578.38	248.86	237.26	179.44	2879.77	236.75	1339.23	4708.26	0	0	0	0	0	36263.4	22
O16	A15	0	0	0	0	0	0	0	0	650.9	0	0	0	0	0	0	0	162.57	0	0	849.32	0	1062.94	148.09	163.83	227.63	2087.47	0	0	174.3	347.23	211.23	5272.31	1153.92	0	0	570.81	83.49	3265.78	0	267.67	332.23	280.7	0	0	0	0	17312.4	22
O17	A1	0	0	0	0	0	0	0	291.17	314.75	769.06	841.49	684.8	873.05	1347.05	2108.8	37	1000.56	684.8	873.05	251.66	86.89	2108.8	139.3	903.79	114.64	320.87	47.83	73.93	159.91	259.5	452.42	8056.17	197.04	82.18	87.42	62.67	469.19	2131.89	215.29	1300.57	2235.41	48.76	1261.38	6190.16	0	0	37083.2	22
O17	A3	0	0	0	0	0	0	0	0	414.8	430.79	0	340.59	388.77	476.24	477	1505	1070.77	1007.26	0	0	482.92	914.46	113.52	0	215.13	703.18	238.75	393.78	0	0	0	4826.66	1022.91	717.5	314.69	655.45	3069.87	520.68	197.12	272.77	743.64	230.24	874.71	373.95	231.17	5343.99	28568.3	22
O17	A4	0	0	0	0	0	0	0	0	0	0	105.18	0	0	129.73	0	0	81.33	429.51	0	496.88	1085.69	1093.08	0	3833.43	207.95	96	203.23	732.46	154.03	212.77	2224.32	13881.4	505.54	168.14	0	412.9	564.59	81.2	554.1	126.95	1982.66	238.67	524.06	131.01	0	8345.94	38602.8	22
O17	A5	0	0	0	0	0	0	0	0	479.4	0	15.7	0	44.28	0	0	0	52.4	12.72	9.55	0	40.86	161.62	0	105.82	156.47	427.09	71.32	36.55	48.85	16.72	12.92	252.13	786.88	198.28	0	522.72	322.14	749.05	70.44	5.83	264.56	76.97	78.91	81.93	118.4	978.93	6199.44	22
O17	A6	0	0	0	0	0	0	0	1170.97	469.17	0	632.1	0	1592.17	687.89	896.08	1026.87	3005.31	1712.37	842.25	491.53	4698.82	482.43	1062.94	120.29	103.48	79.06	156.26	155.03	194.46	312.39	134.05	1577.28	27.19	543.28	93.91	251.38	117.24	1187.34	875.68	86.43	185.32	286.05	0	1802.65	0	0	27059.7	22
O17	A7	0	0	0	0	0	0	0	1039.72	1040.08	593.4	1511.21	1357.11	1274.4	1623.22	2354.99	1640.67	3219.53	1863.25	878.84	0	0	1168.61	383.86	1469.64	230.03	1204.41	758.25	14929.3	4230.57	0	374.46	1980	481.83	1321.07	289.09	411.82	605.27	177.04	375.48	251.54	609.2	157.76	323.04	3099.63	244.67	1377.05	54850	22
O17	A8	0	0	0	0	0	0	0	0	202.64	0	175.16	0	373.02	0	440.77	154.04	439.99	233.34	268.82	21.95	357.57	436.81	802.3	2252.68	253.58	310.3	162.46	1301.44	465.71	191.63	428.53	2166.24	188.39	124.08	57.35	1176.98	80.95	147.91	593.15	88.44	779.51	158.14	853.2	256.18	81.12	4882.75	20907.1	22
O17	A9	0	0	0	0	0	0	0	411.13	456.26	399.45	495.02	449.8	639	348.61	475.49	349.13	737.16	646.26	209.81	1629.65	1152.82	2512.88	316.62	1462.25	580.56	435.03	272.09	2698.73	1048.04	630.68	2026.65	11065.6	303.11	1525.46	171	315.77	269.52	572.31	165.58	233.65	1277.18	143.41	908.85	771.16	237.83	5708.68	44052.2	22
O17	A10	0	0	0	0	0	0	0	0	44.79	0	38.33	0	91.88	0	33.16	0	108.58	0	0	247.08	433.95	543.29	26.25	79.53	122.67	108.89	83.33	286.56	153.2	97.25	415.25	2972.29	0	252.09	391.19	264.56	95.3	937	64.29	439.21	683.01	58.87	493.83	153.07	88.58	3575.37	13382.7	22
O17	A11	0	0	0	0	0	0	0	0	0	0	22.14	35.25	71.81	0	57.77	0	65.45	0	26.02	416.58	1005.88	1166.16	0	0	1682.94	1056.96	94.07	160.96	79.19	266.42	399.87	10341.2	220.75	470.01	501.51	214.29	932.33	1901.88	323.33	319.1	958.3	199.78	2763.32	99.07	50.31	1762.2	27664.9	22
O17	A12	157.94	0	0	45.82	0	0	0	0	446.42	97.8	90.7	0	0	0	0	0	53.88	41.67	50.73	424.19	0	717.92	0	726.92	134.63	753.54	53.25	63.89	24.75	19.2	354.63	4704.43	2094.72	319.8	148.04	113.74	499.05	47.52	25.28	194.39	455.31	114.07	256.3	0	0	747.73	13978.3	22
O17	A13	0	0	0	0	0	0	0	0	0	0	117.49	0	0	0	0	0	226.85	78.39	155.78	407.17	496.82	1545.93	132.88	91.29	67.94	284.92	0	667.86	106.61	185.82	928.72	12358.9	26.59	148.95	0	1279.82	319.34	465.05	128.26	66.42	881.11	33.61	467.31	80.85	0	0	21750.6	22
O17	A14	0	0	0	0	0	0	0	80.57	0	0	0	0	0	0	0	0	53.82	12.58	12.51	45.07	31.05	367.92	0	155.77	19.52	377.81	20.17	53.87	87.67	9.83	174.67	2214.35	802.18	143.89	123.68	579.9	96.7	593.79	55.1	97.23	412.97	0	76.46	133.07	129.85	61.72	7023.72	23
O17	A15	0	0	0	0	0	0	0	591.21	830.11	1518.93	979.68	1925.66	1375.68	976.87	1320.14	2058.46	2409.76	0	0	14.88	177.91	1362.37	190.24	501.33	872.18	6940.11	228.24	1257.65	301.72	653.32	305.72	737.81	165.27	490.35	617.51	803.44	379.68	1295.23	307.29	292.66	437.07	894.87	4629.47	2693.83	0	0	40536.7	23
ug/g drwgt
[truncated: 19 more columns]

## Sheet: Phytochemical metrics
Orchard			Chemotypes in orchards
	Average distance	STD distance	Dominance_D CT	Simpson_1-D CT	Shannon_H CT	Evenness_e^H/S CT		div prom arb	Avg dist	STD dist	Median dist	Red mite	Branch Borer	Thrips	Whytefly	Fruit rot	Scab	Ped Coll Blight
O1	4.27236e+06	1.66486e+06	0.102	0.898	2.342	0.9456		2.79072	4.27236e+06	1.66486e+06	3.69671e+06	18.4667	15.1	2.13333	0.9	0.8	1	0.383333
O2	2.94203e+06	1.38065e+06	0.3672	0.6328	1.331	0.6306		2.34615	2.8577e+06	1.38198e+06	2.34622e+06	20.7321	15.125	1.16071	0.892857	0.357143	0.714286	0.571429
O3	2.95268e+06	1.09026e+06	0.2066	0.7934	1.673	0.8877		2.73591	2.95268e+06	1.09026e+06	2.74501e+06	23.5962	1.86538	0.711538	0.192308	0.0769231	1.76923	NA
O4	3.6205e+06	1.08424e+06	0.1429	0.8571	2.008	0.9306		2.90535	3.36189e+06	1.44796e+06	3.68308e+06	9.44643	0.732143	0.0178571	0.785714	1.57143	1.71429	0.178571
O5	3.0069e+06	1.173e+06	0.3776	0.6224	1.253	0.7		2.33903	3.0069e+06	1.173e+06	2.67009e+06	6.80357	0.482143	NA	0.589286	1.30357	1.67857	0.857143
O6	3.00711e+06	1.32675e+06	0.2426	0.7574	1.499	0.8951		2.23789	3.14714e+06	1.32675e+06	2.99343e+06	21.6042	0.479167	0.166667	1.83333	2.39583	1.0625	0.625
O7	2.86829e+06	1.15481e+06	0.2551	0.7449	1.47	0.87		2.44017	2.86829e+06	1.15481e+06	2.57139e+06	3.08929	0.160714	1.94643	2.26786	2.5	0.821429	0.142857
O8	1.99896e+06	705218	0.2781	0.7219	1.413	0.8214		2.48175	1.99896e+06	705218	1.9046e+06	23.5	0.541667	0.770833	3.1875	2.27083	0.895833	0.895833
O9	3.94365e+06	1.41797e+06	0.1361	0.8639	2.098	0.9057		2.31094	3.94365e+06	1.42053e+06	3.73557e+06	32.9333	3.18333	0.583333	3.3	0.75	2.01667	0.65
O10	1.74191e+06	623967	0.4438	0.5562	0.8981	0.8183		2.54127	1.82791e+06	623967	1.73057e+06	26.5577	1.40385	1.42308	3.94231	1.67308	2.5	1.30769
O11	3.63275e+06	1.10084e+06	0.1911	0.8089	1.859	0.8025		2.61883	3.63275e+06	1.10084e+06	3.57621e+06	30.9643	1.76786	2.58929	4.19643	2.30357	0.392857	0.535714
O12	2.67961e+06	1.0858e+06	0.4592	0.5408	0.876	0.8004		2.24833	2.67961e+06	1.0858e+06	2.50996e+06	4.91071	2.96429	6.75	NA	1.92857	1.16071	0.660714
O13	4.243e+06	2.47531e+06	0.3673	0.6327	1.352	0.6441		2.40916	4.243e+06	2.47531e+06	3.18495e+06	18.8214	1.66071	8.10714	14.6071	2.46429	1.60714	0.589286
O14	3.43736e+06	982904	0.2	0.8	1.749	0.8212		2.66711	3.43736e+06	982904	3.27937e+06	NA	2.18333	10.35	NA	1.83333	2.2	0.833333
O15	4.21151e+06	2.15744e+06	0.1467	0.8533	2.061	0.8727		2.56973	4.21151e+06	2.15744e+06	3.42387e+06	NA	1.69048	6.95833	NA	1.51786	1.69643	0.571429
O16	2.75086e+06	1.0042e+06	0.3373	0.6627	1.411	0.683		2.3135	2.75086e+06	1.0042e+06	2.76234e+06	NA	2.09615	8.01923	NA	1.55769	1.94231	0.576923
O17	3.30379e+06	1.05908e+06	0.2426	0.7574	1.586	0.8138		2.67586	3.30379e+06	1.05908e+06	3.0795e+06	1.30357	NA	0.178571	NA	0.636905	2.27381	0.452381

## Sheet: Matrix comp+enemies by orchards
Orchard	Tree	b-pinene	b-mircene	a-terpinene	p-cymene	limonene	b-Z-ocimene	g-terpinene	a-terpineol	estragole	eugenol	b-caryophyllene	a-Humulene	germacrene.D	a-farnesene	d.cadinene	germacrene.B	germacren-D-4-ol	caryophyllene.oxide	myristic.acid	octadecane	farnesylacetate	1-hexadecanol	palmitic.acid	methyl.linoleate	Phytol	ethyl.linoleate	2-[(8Z,11Z)-Heptadeca-8-11-dieneyl]furan	tricosane	Androstan-17-one, 3-ethyl-3-hydroxy-, (5à)-	17-Pentatriacontene	2-Hexadecenoic acid, methyl ester, (E)-	Linoleic acid ethyl ester	unknown1	unknown2	unknown3	17-Pentatriacontene	b-Stigmasterol	7,10,13-Eicosatrienoic acid, methyl ester	7,10,13-Eicosatrienoic acid, methyl ester	heptacosane	persin 1	persin 2	squalene 1	squalene 2	eicosane	b-tocopherol	Conc total	Chemotype
O1	A1	0	0	0	0	0	0	0	0	1006.5	0	0	0	2484.95	0	0	0	0	3168.29	3237.6	1051.2	866.05	494.74	1122.1	767.27	99.61	35.85	0	3012.67	0	3129.24	0	98.96	141.67	0	294.86	150.49	345.19	192.68	0	0	35.65	0	211.4	0	0	688.33	22635.3	1
O1	A2	0	0	0	0	0	0	0	0	634.55	1096.55	1685.11	1240.49	1070.32	1172.94	1153.2	634.55	571.08	1724.93	540.8	572.94	462.83	299.55	509.8	495.55	28.74	0	0	0	0	0	0	116.83	264.61	274.6	0	68.1	195.25	83.06	0	0	24.01	0	27.65	0	554.67	112.52	15615.2	2
O1	A3	0	0	0	4676.42	6834.85	0	0	0	3730.39	6283.52	4088.09	0	0	0	0	0	2239.87	5047.92	7393.97	2934.35	6511.24	1258.72	2340.3	849.17	825.57	341.34	1047.15	842.83	0	0	1152.63	575.76	1111.61	456.44	0	1200.1	809.61	547.87	1298.26	394.2	282.83	737.33	5608.76	464.23	454.09	6483.01	78822.4	3
O1	A4	0	0	0	0	0	0	0	0	942.25	0	1635.11	0	1500.69	0	1061.23	0	811.7	0	1324.78	427.94	395.99	248.97	0	1147	32.68	39	0	1754.61	0	212.34	0	0	223.42	166.06	205.29	109.4	311.33	95.18	64.7	175.8	219.67	222.6	266.3	230.79	289.74	213.92	14328.5	4
O1	A5	0	0	0	0	0	0	0	0	0	0	0	0	3609.55	0	4817.13	0	2323.34	2793.13	2814.06	1091.16	3176.85	1396.11	1876.39	2856.36	3654.29	137.71	0	472.34	0	0	597.81	241.11	696.1	184.33	0	1000.91	484.16	276.33	0	207.22	165.86	245.19	3806.5	0	0	292.78	39216.7	4
O1	A6	0	0	0	0	0	0	0	0	279.73	689.03	991.38	805.12	1449.21	1469.13	701.81	1039.3	573.63	1178.76	830.28	207.27	163.81	195.95	132.49	0	53.72	22.21	0	0	0	0	0	304.04	176.08	108.74	0	116.55	93.54	171.21	0	99.74	167.68	0	191.35	35.46	1576.62	569.02	14392.9	4
O1	A7	0	0	0	0	0	0	0	0	1549.51	2856.92	4053.46	5525.33	3461.25	1436.68	3180.28	3800.31	3897.86	1372.54	4530.66	1466.57	1908.43	993.04	537.88	552.19	41.81	58.3	53.61	3402.46	221.76	276.39	136.52	345.65	177.44	186.57	35.18	3547.85	4580.33	1858.2	46.17	840.53	283.09	3643.77	0	0	0	0	60858.5	4
O1	A8	0	0	0	0	0	0	0	0	0	5381.66	5618.92	5345.91	5201.97	0	4543.19	3581.46	3295.96	3004.46	3550.67	2542.99	1342.93	1320.68	2121.73	1575.03	62.81	71.65	0	3442.92	0	348.38	0	155.87	407.38	0	0	140.7	326.01	406.15	676.57	191.56	38.75	5269.9	84.13	263.47	621.93	287.81	61223.5	4
O1	A9	0	0	0	0	0	0	0	0	567.03	0	0	0	0	0	0	0	0	0	0	339.02	458.78	237	606.11	233.82	20.49	165.48	0	0	0	0	54.37	86.06	126.58	94.12	0	196.98	85	122.01	0	17.32	530.01	0	564.96	0	0	355.94	4861.08	5
O1	A10	0	0	0	0	0	0	0	0	0	0	5810.94	6290.63	7507.9	0	5316.94	6079.09	7606.25	0	1423.73	719.12	738.21	1200.97	1310.56	822.13	214.6	82	196.95	0	0	0	0	230.96	0	258.55	0	0	0	998.96	309.66	300.92	75.09	0	108.33	0	0	1974.51	49577	6
O1	A11	0	0	0	0	0	0	0	0	361.69	0	1389.03	0	1116.46	0	0	0	831.61	0	770.99	390.63	591.94	364.45	314.97	0	25.98	38.98	0	0	0	0	0	0	0	99.64	0	143.56	71.1	152.6	126.41	75.67	17.29	0	29.22	993.61	81.97	95.1	8082.9	6
O1	A12	0	0	0	0	0	0	0	0	2292.68	2585.86	2345.51	3084.18	1875.1	0	2283.3	2681.34	1848.78	2411.98	1246.03	770.53	936.03	643.86	564.23	0	0	79.82	0	0	0	0	0	315.05	624.44	361.17	686.72	583.76	464.84	424.3	0	0	80.3	528.26	449.45	544.64	473.99	447.33	31633.5	6
O1	A13	0	0	0	0	0	0	0	0	4174.6	0	0	0	0	0	0	0	0	0	0	5907.05	0	6381.69	4177.59	0	0	739.6	0	0	0	0	0	4528.88	0	0	0	0	4114.89	3370.81	0	0	834.65	0	1970.86	0	5609.4	2347.63	44157.7	7
O1	A14	0	0	0	0	0	0	0	0	2153.6	0	1759.24	0	0	0	0	0	0	0	0	1530.09	1417.16	980.96	598.8	874.01	0	58.18	0	0	0	0	0	223.81	290.38	423.43	0	363.78	687.33	283.33	0	0	67.28	0	682.86	949.48	0	1972.04	15315.8	7
O1	A15	0	0	0	0	0	0	0	0	0	0	2300.05	2180.91	1971.13	1563.91	1129.3	2588.44	628.11	1716.92	1814.84	1767.57	1638.02	393.68	880.54	230.28	1885.03	141.44	0	342.4	0	330.14	386.17	117.93	169.81	337.94	0	521.29	304.57	309.72	423.59	447.74	165.6	163.31	327.82	451.63	350.89	453.39	28434.1	8
O2	A1	0	0	0	0	0	0	0	0	2571.07	1931.78	2228.04	2129.71	2857.64	2415.17	1974.34	2142.89	1493.92	1704.33	2135.35	614.87	682.66	335.26	873.19	1557.59	67.51	0	0	0	0	0	370.12	104.68	81.03	0	0	0	314.63	163.04	0	484.77	45.69	0	73.26	372.28	241.98	164.58	30131.4	9
O2	A2	0	0	0	3.69	44.37	11.06	8.06	0.23	511.21	4.85	27.05	3.01	37.01	9.62	21.24	11.31	28.85	4.97	14.96	62.63	104.51	333.07	238.99	59.54	175.67	268.36	28.1	69.81	75.08	9.42	153.43	1319.7	899.96	118.77	76.1	628.27	201.13	545.04	73.63	78.25	527.57	167.13	228.12	129.46	29.3	0	7342.53	9
O2	A3	0	0	0	0	0	0	0	0	945.61	0	0	1570.18	1760.88	1481.76	1720.29	1390.88	1208.39	1244.06	1763.55	351.96	344.31	218.6	560.77	935.72	28.52	36.51	0	0	0	0	212.82	62.45	67.12	0	0	179.35	190.91	92.42	0	279.22	26.25	0	40.9	92.6	942.9	107.1	17856	10
O2	A4	0	0	0	0	0	0	0	0	1726.56	0	0	0	0	0	0	0	2458.3	0	615.97	848.21	380.05	455.9	650.58	0	34.15	47.78	0	0	0	0	303.97	90.43	130.59	281.91	0	216.33	312.55	166.05	0	436.05	139.81	82.92	296.95	649.97	0	173.93	10499	10
O2	A5	0	0	0	0	0	0	0	0	459.79	0	0	0	0	0	0	0	62.91	27.38	148.81	18.74	17	73.45	124.71	585.84	170.31	240.69	31.68	60.73	77.99	38.13	1348.68	13389.5	640.54	160.15	59.65	92.27	108.46	5389.19	4.65	164.24	205.34	223.42	254.91	0.91	11.72	838.24	25030	10
O2	A5b	0	0	0	0	0	0	0	0	45.98	0	0	0	0	0	0	0	6.29	2.74	14.88	1.87	1.7	7.35	12.47	58.58	17.03	24.07	3.17	6.07	7.8	3.81	134.87	1338.95	64.05	16.01	5.96	9.23	10.85	538.92	0.46	16.42	20.53	22.34	25.49	0.09	1.17	83.82	2502.97	10
O2	A6	0	0	0	1.54	7.69	6.87	3.96	0	469.83	6.46	14	19.65	39.58	10.64	29.02	12.82	60.63	0	24.57	69.6	78.49	388.05	0	0	157.29	434.39	68.11	52.96	90.12	25.65	129.62	2475.62	485.85	198.99	261.14	427.62	3.27	484.05	84.79	116.14	537.27	352.2	40.84	298.07	0	93.95	8061.34	10
O2	A7	0	0	0	0	0	0	0	0	1003.76	217.34	1408.97	0	1393.43	0	0	0	523.11	0	0	0	50.56	66.38	248.61	0	106.92	0	0	0	0	0	0	3992.03	1296.14	800.73	0	0	510.52	243.4	0	356.11	611.86	290.07	270.67	150.13	142.39	529.18	14212.3	10
O2	A8	0	0	0	0	0	0	0	0	504.79	5.99	36.1	13.53	44.56	2.82	6.13	14.41	35.77	3.46	6.32	53.48	63.07	412.5	204.92	137.9	168.29	536.09	0	59.31	0	0	197.43	12435.4	244.29	100.74	975.82	6823.31	173.92	653.5	2021.49	1711.28	2574.11	76.17	103.42	10.82	22.66	249.73	30683.5	10
O2	A9	0	0	0	0	0	0	0	0	523.53	12.25	51.53	8.1	65.03	15.09	30.19	0	63.18	7.33	21.03	18.85	101.66	415.86	228.3	50.01	73.58	321.44	102.55	57.54	87.69	40.88	258.56	617.74	850.16	217.58	116.49	536.64	206.95	492.5	88.1	93.23	338.71	70.55	221.15	78.89	95.03	43.13	6621.03	10
O2	A10	0	0	0	0	0	3.99	3.25	0	508.95	7.46	52.08	6.33	43.94	14.14	2.23	0	46.54	16.82	15.52	10.36	186.26	128.81	185.05	482.59	146.61	5554.74	15.2	33.61	64.18	17.24	426.81	3537.88	579.64	42.05	21.08	602.29	673.91	451.6	5.92	129.6	1151.77	78.84	172.35	102.9	137.47	0	15660	10
O2	A11	0	0	0	0	0	0	0	0	520.21	17.08	39.88	6.86	59.88	10.9	7.15	0	57.87	20.87	18.1	12.27	98.51	339.16	197.13	178.41	17.66	249.49	74.02	50.37	66.09	35.18	39.98	4739.82	843.09	198.8	112.23	352.51	205.28	2825.5	86.1	675.18	353.02	125.81	192.52	79.02	77.58	31.94	13015.5	10
O2	A12	0	0	0	0	0	0	0	0	0	0	0	0	0	0	0	0	360.86	0	0	815.18	755.98	1246.8	795.2	548.1	19951.5	8313.56	0	0	0	0	1321.06	5703.67	3427.57	1700.29	0	1539.35	1426.79	2536.26	0	1351	8550.85	0	1372.77	496.97	1289.85	2279.43	65783.1	10
O2	A13	0	0	0	0	0	0	22.97	0	496.53	2.95	9.61	39.7	11.04	66.73	27.52	58.72	10.44	20.21	37.68	21.52	184.91	248.22	73.65	69.17	145.42	292.46	50.02	26.9	75.77	71.31	279.19	1728.56	858.03	5104.72	108.75	588.32	219.22	4354.34	81.21	154.73	1496.79	63.1	202.83	971.04	564.06	906.46	19744.8	10
O2	A14	0	0	0	0	0	0	0	0	502.58	4.2	22.42	3.58	54.35	7.46	6.76	0	54.77	20.45	2.05	8.77	3.66	59.63	102.85	138.16	16.12	23.29	12.65	35.36	38.93	27.35	1036.7	11350.7	677	187.82	82.85	240.57	127.11	6517.93	40.17	147.3	139.85	802.58	158.55	14.76	133.95	110.26	22913.5	10
O2	A15	0	0	0	0	0	0	0	0	0	0	0	0	0	0	0	0	0	0	0	23.21	93.35	546	207.05	195.21	15.48	621.01	10.98	0	0	32.67	1556.13	5636.75	27905.8	41.41	0	0	177.28	292.31	6.85	52.28	232.43	64.69	99.5	4.99	9.8	0	37825.2	10
O3	A1	0	0	0	0	0	0	0	0	522.36	13.2	40.59	0	55.89	0	10.09	0	15.19	3.35	25.05	49	6.9	361.82	0	144.18	161.79	337.43	76.92	70.16	87.58	26.15	242.64	2447.32	941.08	241.56	94.68	638.27	271.39	738.16	82.38	123.62	404.44	78.96	128.23	114.31	295.12	21.72	8871.53	10
O3	A2	0	0	0	0	0	0	112.11	458.31	499.39	529.22	541.41	423.59	849.55	0	510.65	991.58	949.62	354.57	657.17	1519.86	1256.73	1528.63	248.04	1130.69	1053.04	717.55	219.15	1114.82	984.6	886.65	2138.72	12188.5	667.76	343.99	180.06	265.28	139.4	1496.34	406.43	716.68	1954.85	184.71	175.57	1226.37	338.29	8275.97	48235.8	10
O3	A3	0	0	0	0	0	0	0	30.84	201.55	142.81	190.38	193.5	436.89	0	243.38	0	311.52	228.54	213.88	316.89	587.83	669.28	232.72	166.77	239.16	1584.86	507.26	373.29	121.98	355.69	0	3755.13	243.83	40.44	23.42	116.17	87.73	594.61	109.26	204.87	393.8	127.77	429.04	249.03	38.1	2706.54	16468.8	10
O3	A4	0	0	0	0	0	0	66.14	0	216.35	237.94	138.24	135.61	170.42	109.99	105.84	0	374.56	103.5	84.85	429.24	670.81	844.5	38.28	196.99	244.03	323.02	289.23	901.71	399.46	299.38	476.76	7655.73	278.67	114.74	60.67	46.38	140.33	63.2	1313.84	671.38	690.13	84.27	684.15	321.91	0	3856.17	22838.4	10
O3	A5	0	0	0	105.77	90.92	264.92	808.82	348.17	0	0	0	0	1333.09	0	0	0	1880.15	300.82	303.54	1213.04	1934.48	1522.01	358.2	670.49	1322.13	4742.03	2704.72	976.26	436.69	543.82	573.81	9961.57	1097.34	629.36	191.13	694.28	5977.78	550.18	838.19	452.58	3183.86	1901	1777.39	1504.02	762.46	8879.92	60834.9	10
O3	A6	0	0	0	0	0	0	0	0	451.97	336.27	880.38	592.14	308.74	980.3	998.86	269.61	1452.92	730.25	223.05	69.27	988.65	1429.27	83.24	396.43	224.4	925.48	0	237.84	176.65	323.26	106.82	2814.97	7543.33	88.93	257.58	176.02	202.11	268.35	94.95	137.71	490.04	79.32	383.14	541.96	0	1064.4	26328.6	10
O3	A8	0	0	0	0	0	0	0	0	156.14	100.36	165.53	0	138.31	0	197.5	171.2	317.34	118.35	34.38	242.68	780.33	1606.46	29.63	208.57	424.02	1007.49	1466.94	347.85	344.1	241.2	2199.61	14939.2	496.56	111.48	128.54	1446.56	464.79	1467.7	106.44	1950.67	1146.31	77.74	751.29	494.91	0	4607.58	38487.8	10
O3	A10	0	0	0	0	0	0	0	477.32	684.92	524.29	600.13	224.12	0	682.39	351.58	789.24	494.85	1108.09	596.99	465.74	2269.51	1175.77	265.24	500.24	4692.19	3748.65	1248.62	483.99	229.99	581.24	639.48	4608.76	105.4	201.82	0	794.59	287.65	1736.57	419.39	445.54	866.91	190.69	638.82	10789.7	0	0	43920.4	10
O3	A11	0	0	0	0	0	0	0	13.29	488.45	57.93	12.79	23.37	9.24	37.86	1.19	104.48	3.85	60.19	18.14	2.94	127.93	132.64	215.01	144.18	690.1	362.08	311.73	10.78	2.79	13.62	230.8	2165.86	910.78	168.79	8.52	599.15	20.25	763.82	56.73	69.48	187.92	45.87	457.12	652.83	45.93	482.62	9711.05	10
O3	A12	0	0	0	0	0	0	0	0	52.6	0	96.04	0	276.45	0	437.98	113.59	123.09	104.66	89.14	536.13	579.73	1011.5	0	0	4109.48	767.64	41.06	17.36	26.29	325.88	271.81	7292.04	159.76	121.62	161.92	496.94	216.14	889.21	23.96	175.04	1066.89	75.35	1288.02	245.3	3504.9	2092.07	26789.6	10
O3	A13	0	0	0	0	0	0	0	35.22	0	4.67	9.05	3.32	9.95	5.38	7.04	24.19	41.49	5.27	18.51	49.26	200.3	206.88	14.27	31.42	214.51	330.75	80.48	9.53	11.65	9.88	188.39	1905.79	58.73	13.16	23.85	54.3	52.49	89.89	13.9	94.84	144.81	9.87	49.17	93.1	20.11	455.29	4590.71	10
O3	A14	0	0	0	0	0	0	0	0	89.1	84.16	147.02	0	0	0	0	0	116.09	0	109.71	267.16	462.89	948.88	0	0	1786.69	5096.17	835.76	461.3	194.49	143.27	311.26	4159.63	149.75	149.21	0	329.82	244.24	936.32	348.65	78.19	911.36	267.59	1414.81	269.67	977.38	236.32	21526.9	10
O3	A15	0	44.26	0.08	8.86	0	0	0	0	515.35	0	0	0	0	0	0	0	37.99	14.05	67.05	143.77	95.88	28.18	260.05	103.3	797.95	48.48	0	50.05	199.17	24.84	234.23	1112.82	870.55	169.42	111.07	607.66	200.61	313.85	64.79	16.22	77.4	70.06	204.04	99.35	534.79	350.6	7476.77	10
O4	A1	0	0	0	120.25	261.82	0	0	1351.78	0	0	0	0	0	0	0	0	404.21	2200.26	1137.83	362.11	250.92	2031.32	276.51	735.9	180.05	910.12	293.28	301.73	211.56	176.22	421.86	12715.6	172.12	394.34	267.32	142.51	538.1	830.53	479.3	670.11	732.82	121.54	314.14	104.26	290.6	1805.76	31206.8	11
O4	A2	0	0	0	0	0	0	68.41	0	513.18	41.35	55.76	25.35	149.05	0	89.06	0	79.1	28.61	3.85	87.55	111.53	252.61	225.45	127.02	173.2	450.27	96.38	44.35	65.28	31.25	210.74	2472.52	910.1	193.47	80.23	623.13	172.24	420.35	34.73	114.04	48.5	11.36	498.51	132.66	135.08	971.56	9747.83	11
O4	A3	0	0	0	0	0	0	0	87.56	259.99	392.63	436.81	398.77	958.78	594.43	953.8	0	648.92	0	713.22	875	1330.91	1154.67	227.8	538.9	713.69	883.49	608.75	2412.17	1603.08	762.07	1523.24	7476.96	583.96	490.14	92.69	123.96	314.56	10488.1	461.16	368.89	1173.8	279.17	964.23	0	0	4889.36	45785.7	11
O4	A4	0	0	0	0	0	0	0	0	0	0	0	0	30.21	135.54	75.12	14.36	149.36	0	0	33.31	92.9	380.29	221.87	89.86	31.63	2.26	207.76	5.49	10	0	233.66	3109.51	862.67	130.3	82.01	614.4	253.56	322.82	1.48	102.75	254.38	30.62	65.57	23.42	54.41	670.44	8291.96	11
O4	A5	0	0	0	0	0	0	0	0	31.54	498.81	565.19	1084.09	876.49	1195.82	869.78	0	966.5	112.68	0	108.76	677.16	211.01	263.23	369.15	225.94	1024.35	643.43	603.25	354.02	66.44	778.33	2500.43	2013.53	128.39	226.58	128.39	104.95	226.58	376.47	188.3	1553.82	282.35	0	0	0	0	19255.8	11
O4	A6	0	0	0	0	0	0	0	962.79	1494.08	307.62	528.81	887.74	1924.9	780.93	1896.16	3006.41	1518.56	729.25	1044.93	952.69	1041.03	763.66	1079.82	620.14	627.64	6013.49	5103.21	2653.84	545.9	1110.09	324.12	562.73	0	330.42	1643.5	1599.72	1710.47	1025.45	1122.76	0	2700.86	2126.29	1258.58	929.35	0	0	50927.9	11
O4	A7	0	0	0	0	0	0	0	0	684.27	748.67	733.09	0	866.4	0	549.6	544.75	901.6	1094.13	467.65	938.35	1411.22	1688.47	282.38	295.56	1164.08	3016.65	1536.21	760.24	392.97	381.68	160.64	4469.75	566.58	624.08	0	384.69	475.26	1375.22	621.6	810.61	2125.48	318.22	2026.45	428.64	506.98	4218.36	37570.5	11
O4	A8	0	0	0	0	0	0	0	0	487.19	0	16.05	21.35	7.57	19.64	47.27	0	87.02	1.82	5.03	21.36	274.53	46.22	258.39	28.87	1131.11	995.34	296.41	36.29	58.78	19.09	228.75	439.93	828.06	166.36	0	17.14	312.89	682.97	43.98	97.34	1079.43	41.96	132.41	73.17	1732.15	636.6	10372.5	11
O4	A9	0	0	0	0	870.43	1177.06	2195.21	1102.07	1127.66	732.48	1633.7	1098.2	1286.39	943.13	361.75	559.8	2231.07	471.35	446.43	2033.89	1135.59	1630.02	651.91	422.17	121.4	335.74	341.43	236.93	161.4	338.14	1965.01	3253.8	337.58	523.68	108.12	63.14	466.39	1113.18	310.82	575.78	1586.97	530.19	2505.5	1320.27	0	167.81	38473.6	11
O4	A10	0	0	0	0	0	0	0	0	900.37	641.28	722.6	1001.9	1110.68	975.01	1452.97	935.48	1043.4	978.75	1449.36	1192.48	980.69	1613.13	363.92	375.77	745.96	6378.92	2075.15	811	452.43	417.2	1820.08	3485.11	831.96	347.97	203.04	515.92	920.67	766.25	669.38	389.41	2002.17	972.61	851.76	979.1	650.26	5341.89	47366	11
O4	A11	0	0	0	0	0	0	0	0	1078.76	710.73	745.12	737.62	722.88	476.57	1643.91	0	670.46	1337.15	723.95	578.34	1073.5	1820.88	871.95	657.2	1104.8	8328.05	2016.11	1709.81	455.03	552.41	360.06	3049.58	280.92	394.88	424.59	820.25	872.79	516.11	763.73	510.32	1800.05	319.98	1274.78	193.33	591.71	6163.49	46351.8	11
O4	A12	0	0	0	0	0	0	0	10.95	93.03	27.27	54.19	0	31.78	28.15	179.26	0	86.09	0	42.35	105.84	57.9	156.27	165.54	0	17.59	14.77	17.22	67.52	44.88	36.67	45.95	698.16	873.87	362.49	81.48	10.94	128.13	1630.86	19.45	26.72	497.49	225.81	204.73	16.09	78.75	1495.51	7633.7	11
O4	A13	0	0	0	0	0	0	0	0	0	0	487.27	489.32	428.22	0	0	0	1069.06	522.17	503.95	735.61	785.01	1761.91	167.32	196.21	798.01	2241.13	1321.22	824.36	330.37	153.98	1633.71	12463.4	2137.59	582.54	427.38	2985.86	1607.44	7413.72	367.35	372.68	1351.2	0	4845.17	386.42	627.61	3850.59	53867.8	11
O4	A15	0	0	0	0	0	0	0	0	239.47	0	297.04	95.31	130.65	102.79	294.96	293.53	703.56	249.11	192.72	545.45	1180.09	2125.56	101.7	529.05	734.75	1767.82	202.16	467.54	380.62	397.74	512.17	20330.7	907.03	341.32	205.19	166.19	312.36	9442.32	378.94	354	2791.6	176.15	1040.86	596.88	232.29	4935.37	53755	11
O5	A1	0	0	0	0	0	0	0	0	0	0	0	0	0	0	0	0	0	0	0	132.12	21.19	655.77	0	0	158.81	314.55	0	174.45	0	71.27	318.95	5276.15	21.74	52.23	0	715.54	1761.59	557.88	202.96	287.36	5694.62	67.02	857.82	1393.47	39.1	0	18774.6	11
O5	A2	0	0	0	0	497.41	0	266.21	0	94.83	61.78	245.89	0	114.89	0	89.82	0	47.25	0	62.92	50.65	64.85	446.04	39.6	36.69	0	654.22	9.02	85.99	0	0	155.99	2778.01	0	142.33	235.89	0	0	0	54.92	88.28	979.55	71.11	477.5	484.08	55.74	14.52	8405.98	11
O5	A3	0	0	0	0	0	0	0	0	415.85	0	0	0	0	0	0	0	285.73	0	0	170.16	631.28	3204.08	0	250.97	72.82	1672.58	192.49	118.23	224.56	59.93	1517.75	18783.5	1001.12	386.59	842.73	88.26	387.73	3238.94	199.7	293.36	1478.37	1034.03	924.07	856.49	267.06	0	38598.4	11
O5	A4	0	0	0	0	0	160.97	133.5	0	543.23	0	734.49	798.16	1605.54	124.09	65.56	0	293.17	0	0	227.45	0	255.88	0	72.97	58.26	83.52	28.66	322.98	46.57	41.5	407.07	1620.38	79.75	44.99	0	36.36	127.06	179.65	44.29	22.6	345.26	185.08	88.61	183.08	22.91	19.4	9002.99	11
O5	A5	0	0	0	0	105.24	0	0	0	114.01	58.34	91.96	26.07	69.72	0	24.8	0	62.72	82.61	4.86	142.09	197.42	940.83	94.55	218.64	59.15	630.03	60.2	203.17	32.13	51.65	622.17	7842.14	1126.93	379.24	124.82	130.77	1910.72	666.22	195.86	279.56	3230.02	76.44	394.54	627.39	19.29	0	20896.3	11
O5	A6	0	0	0	0	0	0	0	0	0	290.03	498.09	0	1099.35	0	100.09	0	513.58	0	0	0	149.75	1040.07	0	127.87	32.62	1174.24	18.26	78.32	0	55.3	601.87	3805.39	1021.69	1146.67	0	148.67	202.7	262.75	0	0	2551.71	154.57	731.16	701.51	73.81	29.72	16609.8	11
O5	A7	0	0	0	0	0	0	0	0	58.25	0	0	0	53.18	35.66	27.88	0	118.13	0	0	119.06	298.78	1498.56	91.12	237.13	56.89	1850.31	195.58	101.96	137.43	26.91	413.31	13295.3	873.37	474.73	56.7	158.72	410.46	1201.94	91.07	240.18	1426.43	96.93	607.36	301.48	93.26	0	24648.1	11
O5	A8	0	0	0	124.26	31.65	0	0	0	90.28	0	11.71	0	18.5	0	43.94	0	19.61	0	31.63	32.5	178.73	973.86	119.53	69.38	97.56	878.3	0	156.01	0	46.92	506.42	6358.78	590.8	227.17	101.84	124.15	196.42	830.15	78.61	147.8	465.63	117.96	335.88	276.68	91.87	0	13374.5	11
O5	A9	0	0	0	0	0	0	0	0	0	0	285.98	0	409.58	0	258.57	0	5414.93	0	0	759.43	1985.33	2557.04	580.74	486.34	960.19	3050.97	0	565.29	0	0	479.98	13971.1	5742.69	1311.08	910.69	1494.09	1113.3	8063.37	323.19	314.27	4445.26	467.91	1672.35	2479.92	218.8	0	60322.4	11
O5	A10	0	0	0	0	0	0	0	0	0	0	106.44	79.11	211	0	80.55	0	414.14	0	169.01	4775.11	127.93	688.66	105.43	162.42	57.6	548.41	119.92	0	0	0	408.44	4440.36	1405.72	59.94	103.12	225.37	1190.34	679.01	128.7	144.03	3201.39	103.5	492.21	1008.22	48.2	0	21284.3	11
O5	A11	0	0	0	0	0	0	0	0	48.31	0	81.84	0	52.41	0	27.25	0	104.64	0	0	96.87	416.23	3284.3	0	0	82.56	901.96	117.75	131.44	0	129.51	1340	20120.3	664.42	919.27	332.34	715.36	953.31	2177.47	407.21	465.62	1918.12	268.72	936.15	985.39	215.76	0	37894.6	11
O5	A12	0	0	0	0	0	0	0	0	342.22	244.06	108.67	270.57	221.99	264.62	414.53	297.46	540.38	394.92	470.4	2444.38	205.95	2010.66	0	0	159.46	1840.55	252.46	168.97	148.62	561.82	314.68	10927.8	427.64	2770.86	4143.93	586.41	1065.99	2842.58	238.52	367.54	2876.54	242.26	1122.37	1018.3	81.08	0	40389.2	11
O5	A13	0	0	0	0	0	0	0	0	531.95	16.67	39.53	0	0	0	0	15.52	60.67	23.27	5.92	36.06	69.63	102.75	224.64	162.2	145.01	374.85	94.4	42.96	0	70.91	241.28	2593.36	782.31	198.72	0	11652.8	313.46	625.63	36.97	89.2	680.74	59.69	69.28	139.61	132.17	0	19632.2	11
O5	A15	0	0	0	0	0	0	0	0	0	0	0	0	176.94	0	130.79	0	611.86	0	463.01	301.26	2285.74	1039.36	879.16	352.03	221.14	2518.7	111.02	84.63	121.44	740.91	0	6088.05	1630.02	666.19	768.28	1456.41	8140.88	3737.78	861.13	818.62	18362.5	515.07	1736.98	3980.2	61.33	0	58861.4	11
O6	A1	0	0	0	0	0	0	0	0	519.38	0	0	0	0	0	0	0	60	0	0	59.74	23.25	368.39	195.81	137.41	67.15	59.47	74.09	39.8	67.99	37.62	172.72	1779.58	732.16	180.01	109.68	639.14	219.56	415.44	40.7	135.99	358.93	86.81	59.98	75.02	112.95	0	6828.77	11
O6	A2	0	0	0	0	0	0	0	0	89.42	0	0	16.02	85.93	0	0	0	126.66	0	0	131.63	340.64	1336.42	1765.15	125.33	159.75	1100.2	127.55	178.53	83.37	57.49	2077.97	20734.1	362.78	122.28	105.45	4178.28	1539.11	5425.51	114.23	509.83	579.45	34.63	280.06	600.78	205.66	0	42594.2	11
O6	A4	0	0	0	0	0	0	0	0	523.09	13.71	52.19	3.68	0	0	0	0	82.72	8.27	10.48	46.36	71.73	307.24	243.55	133.93	139.62	404.48	60.51	60.95	76.95	46.02	239.48	2867.52	901.39	244.13	118.25	472.16	244.94	833.66	83.25	119.79	508.03	77.22	169.99	62.86	107.44	289.5	9625.09	11
O6	A5	0	0	0	0	0	0	0	0	0	401.78	86.44	0	1378.36	758.56	569.83	0	0	0	0	0	1404.38	2342.25	231.35	132.86	960.15	1711.43	304	133.27	470.67	679.83	1516.17	21527.3	0	0	0	2571.14	833.18	0	1084.7	189.14	1490.6	1670.96	510.1	1226.36	185.08	0	44369.9	11
O6	A6	0	0	0	0	0	0	0	0	28.26	0	0	0	0	0	0	0	614.13	44.67	166.61	336.11	363.18	1030.98	81.02	147.14	202.11	928.37	200.1	64.1	64.89	440.67	2371.47	27947.1	202.94	60.39	118.27	771.71	356.66	682.63	0	59.01	96.25	384.43	256.52	240.7	76.63	303.5	38640.5	11
O6	A7	0	0	0	0	0	0	0	0	77.42	0	0	0	0	0	0	0	758.32	144.23	45.24	459.7	466.24	1831.85	74.63	147.89	274.17	868.52	358.15	407.04	109.42	437.48	2279.42	30899.1	264.49	331.82	234.04	994.02	931.12	1054.98	175.27	751.94	1876.72	166.69	397.81	1108.29	865.64	759.89	49551.6	11
O6	A8	0	0	0	0	0	0	0	0	223.99	0	0	561.31	477.88	0	0	0	0	0	0	0	376.74	2244.51	102.12	128.34	316.45	501.12	187.49	34.2	90.36	144.7	1570.77	0	450.81	180.61	0	431.68	913.58	912.69	147.14	551.55	3221.79	99.02	74.14	427.69	0	2397.5	16768.2	11
O6	A9	0	0	0	0	0	0	0	0	0	0	0	0	0	0	0	0	38.22	0	0	0	35.21	458.54	0	0	100.14	462.49	5.4	25.13	0	18.07	57	2520.62	0	202.65	105.21	64.53	204.7	612.78	0	128.45	494.94	0	261.11	58.89	50.94	123.63	6028.65	11
O6	A10	0	0	0	0	0	0	0	0	329.4	0	0	0	313	0	0	0	361.3	0	0	0	0	1359.64	0	0	70.08	277.87	641.56	0	0	0	845.26	1265.09	13745.3	734.26	518.02	304.5	137.35	0	0	0	232.32	0	0	0	0	126.71	21261.6	11
O6	A11	0	0	0	0	0	0	0	0	414.77	0	21.9	0	12.42	0	97.19	0	52.81	75.43	81.19	170.67	0.93	343.39	866.53	124.33	84.17	269.14	424.21	21.81	44.64	76.19	337.92	3956.23	95.41	32.17	1213.14	257.02	128.31	670.75	20.84	57.49	283.29	92.6	107.99	37.07	139.41	108.41	10719.8	11
O6	A13	0	0	0	0	0	0	0	0	125.56	0	0	0	0	0	0	0	147.38	267.31	0	541.59	769.3	1510.42	113.16	567.46	797.45	1044.91	96.62	142.65	675.05	67.21	463.9	11654.1	596.9	242.23	630.64	1637.72	2954.56	4247.47	443.71	1315.93	647.08	7496.9	3115.75	289.92	160.21	4699.01	47462.1	11
O6	A15	0	0	0	364.4	0	0	0	0	461.83	0	11.38	0	77.45	0	0	0	41.21	0	0	0	17.09	341.38	0	0	104.87	330.43	0	27.77	21.38	16.8	96.11	915.41	927.75	231.41	0	109.42	114.51	0	69.73	50.13	223.46	25.12	233.07	133.31	1.19	82.56	5029.17	11
O7	A1	0	0	0	0	0	0	0	220.15	845.37	0	920.36	0	3168.29	0	3127.69	1167.5	3816.68	0	0	0	0	2299.1	0	348.41	0	0	0	0	0	0	0	9475.38	0	0	0	0	143.04	1182.61	0	0	5796.56	0	934.95	5582.23	0	0	39028.3	11
O7	A2	0	0	0	0	0	0	0	0	0	0	0	0	83.48	0	0	0	0	0	0	193.2	66.23	1537.54	0	160.18	130.06	599.36	36.74	138.72	184.73	306.77	172.91	4585.9	23.06	215.71	97.25	299.52	478.45	1213.08	301.11	68.92	2512.99	224.4	408.83	1351.89	65.65	39.53	15496.2	11
O7	A3	0	0	0	0	0	0	0	0	755.77	0	0	0	34.57	0	0	0	0	0	0	0	0	4397.89	292.74	56.47	611.1	1249.17	140.15	123.34	106.25	169.97	1007.77	12427.8	766.36	256.33	24.61	681.87	1635.44	6194.07	262.28	777.86	9849.45	144.37	1657.46	5614.57	594.85	117.97	49950.4	11
O7	A4	0	0	0	0	0	0	0	0	875.95	105.15	300.11	0	457.65	0	0	0	147.3	74.49	292.73	0	388.96	5003.79	0	388.84	317.71	2331.4	479.74	166.76	0	116.01	663.68	18337.4	441.84	440.33	0	1978.96	300.46	4430.93	268.72	133.12	2328.21	511.87	788.41	3340.23	410.18	0	45820.9	11
O7	A5	0	0	0	0	0	0	0	0	572.61	0	0	0	96.95	0	0	0	198.77	0	0	0	0	1100.38	0	144.4	0	310.93	0	62.86	25.07	154.19	1090	4716.2	597.57	0	0	60.26	237.53	531.17	92.06	538.67	1690.26	158.12	153.72	1032.71	0	0	13564.4	11
O7	A6	0	0	0	0	0	0	0	11.53	0	0	0	0	5.13	6.33	33.4	23.3	67.59	27.38	28.3	106.67	52.46	105.53	0	97.07	0	242.18	88.76	48.79	93.38	38.76	129.67	1212.51	833.91	256.92	119.81	678.65	171.63	991.14	91.78	136.81	562.43	81.35	15.52	100.24	0	0	6458.93	11
O7	A8	0	0	0	0	0	0	0	0	213.79	0	0	0	242.11	0	0	0	904.72	47.99	0	333.95	56.25	2301.69	97.59	107.59	337.73	1007.07	69.52	268.28	161.39	65.67	779.91	11041.6	603.55	107.54	48.4	49.87	1066.07	2027.8	211.8	507.77	2859	202.05	527.75	1648.43	189.73	0	28086.6	11
O7	A9	0	0	0	0	0	0	0	0	528.7	80.77	0	0	0	0	25.28	0	62.23	0	0	43.54	97.92	97.19	257.9	126.72	125.43	326.18	94.93	15.27	48.61	1.64	285.79	2474.93	937.35	223.16	99.43	576.54	95.6	704.8	75.49	0	511.37	67.82	5.79	116.45	340.68	339.53	8787.04	11
O7	A10	0	0	0	0	0	0	0	0	350.55	0	208.03	0	98.69	0	0	0	146.49	0	0	0	0	2833.68	0	133.35	271.78	2048.87	148.5	112.6	221.91	394.36	1101.14	8844.01	4102.88	486.9	0	2772.02	78.33	148.78	109.93	0	2123.2	213.35	958.17	2710.72	346.54	0	30964.8	11
O7	A11	0	0	0	0	0	0	0	0	1022.53	441.93	851.41	663.05	907.21	0	0	0	200.26	76.99	371.81	157.69	143.27	1740.07	22.52	160.92	163.36	891.45	409.39	50.38	286.88	536.65	831.44	6572.26	198.52	0	0	953.49	254.88	1742.7	148.01	126.15	2027.43	292.58	2306.5	80.82	0	0	24632.6	11
O7	A12	0	0	0	0	127.68	0	0	0	141.82	0	0	0	908.48	0	0	0	259.17	0	576.94	0	0	614.62	0	0	291.96	186.96	10.11	100.02	151.13	291.25	472.52	2689.96	954.29	67.95	0	178.56	75.25	47.2	0	964.72	105.25	0	791.31	106.75	791.31	106.75	11012	11
O7	A13	0	0	0	0	0	0	0	0	0	0	0	0	0	0	0	0	1460.95	0	0	0	0	561.14	0	150.62	406.76	739.47	163.9	454.51	0	0	2088.85	1581.83	322.69	102.98	0	731.74	47.04	676.61	632.32	302.15	2616.75	342.4	317.87	1714.12	0	0	15414.7	11
O7	A14	245.96	0	0	0	0	0	0	0	0	0	0	0	0	0	0	0	243.84	0	0	0	0	309.02	124.86	431.28	0	672.85	638.21	0	89.46	16.01	131.97	4781.5	191.17	68.77	73.78	317.33	285.35	1609.33	38.15	58.38	812.64	25.07	175.66	787.3	127.52	62.76	12318.2	11
O7	A15	0	0	0	0	0	0	0	0	0	0	0	0	43.77	0	779.22	0	0	0	0	0	141.39	5279.3	0	398.73	755.29	1380.4	179.38	83.79	142.01	252.78	3359.14	29437.6	662.34	495.5	59.33	3549.49	1525.82	2344.15	104.01	2385.75	6262.65	455.88	4997.08	247.84	297.65	275.79	65896.1	11
O8	A1	0	0	0	0	0	0	0	0	992.06	959.31	928.09	0	759.56	0	0	0	0	0	0	0	642.71	584.23	0	0	550.38	541.81	522.88	0	0	489.22	474.19	469.79	448.35	0	0	441.73	439.17	429.51	417.11	414.05	399.38	390.98	371.29	363.17	352.22	0	12381.2	11
O8	A2	0	0	0	0	0	0	0	0	249.83	0	476.1	0	0	0	0	0	85.4	0	0	586.09	383.36	2509.33	74.3	335.76	0	2330.69	156.23	83.03	135.97	120.5	933.27	18555	579.37	509.73	612.98	349.23	475.78	2626.88	140.33	884.14	2950.43	164.93	910.89	0	0	0	37219.5	11
O8	A3	1117.7	0	0	0	0	0	0	0	1104.03	0	786.89	0	0	0	0	0	1746.33	0	0	0	2251.98	0	0	400.23	207.01	166.64	0	0	0	0	0	604.46	432.67	77.94	585.32	284.71	205.4	655.2	457.43	177.06	337.07	0	294.54	46.65	0	0	11939.3	11
O8	A4	864.95	0	0	0	0	0	0	0	216.23	0	0	0	0	0	0	0	269.93	0	0	733.41	234.63	1249.36	98.51	352.81	26.68	1048.99	36.07	44.09	106.4	47.21	318.41	8133.37	795.39	203.99	0	202.58	228.89	1150	190.45	258.69	562.54	0	27.47	136.07	0	0	17537.1	11
O8	A5	0	0	0	0	0	0	0	0	461.43	0	0	0	0	0	0	0	0	0	0	7.39	49.18	318.51	221.76	123.1	0	207.84	57.72	60.56	83.74	15.5	182.66	2120.69	748.14	56.66	37.99	649.89	305.52	789.14	81.74	165.31	501.1	75.37	161.92	0	0	0	7482.86	11
O8	A6	313.35	0	0	0	0	0	0	0	406.7	0	0	0	0	0	0	0	430.83	0	0	645.53	209.9	642.66	158.01	41.53	141.61	500.85	0	49.58	79.53	98.1	310.48	4240.35	278.44	170.17	84.29	206.5	159.85	390.01	51.59	278.42	603.98	96.01	0	0	0	0	10588.3	11
O8	A7	0	0	0	0	0	0	0	0	1616.44	274.5	385.58	0	0	0	147.78	0	381.95	0	0	546.67	97.2	1399.96	0	228.92	0	2078.82	270.15	0	0	0	679.87	12340.2	178.79	982.38	1158.61	961.64	1234.92	361.39	0	0	4219.68	0	960.18	0	0	0	30505.6	11
O8	A8	0	0	0	0	0	0	0	0	391.04	0	0	0	887.31	0	0	0	187.46	0	0	876.21	281.76	622.04	156.34	97.23	99.98	2240.29	117.07	206.94	114.33	164.45	17.83	2349.02	2036.91	135.77	418.46	144.1	107.84	3335.99	0	383.63	657.2	74.17	491.82	0	0	0	16595.2	11
O8	A9	57.87	0	0	0	0	0	0	0	485.67	0	0	0	30.53	0	0	0	26.02	0	0	341.13	0	488.22	165.6	134.45	140.37	76.42	86.63	11.4	59.43	49.28	206.59	3427.5	773.11	212.55	72.47	618.37	968.08	959.11	0	170.78	298.57	56.19	188.49	0	0	0	10104.8	11
O8	A10	0	0	0	0	0	0	0	0	402.41	578.41	114.51	0	2133.85	0	0	0	364.37	225.35	57.5	1805.78	381.02	881.29	181.3	418.42	173.7	1862.65	0	0	0	0	0	1916.22	85.61	522.31	0	558.06	10.7	3019.36	0	343.21	711.48	75.42	825.71	0	0	0	17648.6	11
O8	A12	0	0	0	0	0	0	0	0	342.93	18.6	62.42	0	0	0	0	0	0	0	0	69.05	2.74	76.34	1145.7	13.53	130.48	891.6	18.26	13.66	72.25	0	104.56	1099.59	37.64	148.62	55.67	319.7	124.61	1898	95.24	464.51	908.8	0	239.41	325.51	0	0	8679.42	11
O8	A15	0	0	0	0	0	0	0	0	675.53	1463.88	299.86	0	165.68	0	89.26	0	131.32	0	0	337.38	56.35	1080.46	0	2551.36	435.82	1259.17	107.69	288	112.74	64.19	1549.09	6997.88	8729.37	384.37	599.32	200.21	179.62	1202.54	142.08	130.75	148.52	302.99	105	133.43	357.98	0	30281.8	11
O9	A1	709.51	0	0	0	0	0	0	170.87	1288.72	1472.93	0	0	14187.5	0	2851.18	0	227.56	133.27	382.93	1746.27	2244.2	3068.24	504.97	712.9	560.64	5596.48	668.92	109.58	172.51	1521.12	794.51	32533.4	829.49	126.68	388.97	1717.73	1668.09	894.86	295.28	4115.04	2953.68	168.56	448.12	1412	897.12	0	87573.8	11
O9	A2	0	0	0	0	0	0	0	0	2102.78	25.19	326.26	0	707.3	809.43	528.37	315	359.87	365.24	229.74	568.85	712.12	1607.67	90.61	151.49	139.76	1129.04	218.29	166.74	59.64	863.82	1355.02	14801.8	483.71	110.43	20.85	154.45	617.59	1567.03	378.87	1604.88	1883.38	156.4	666.08	1685.48	256.3	0	37219.5	11
O9	A3	0	0	0	0	0	0	0	0	0	0	1987.07	0	1411.13	0	0	0	0	0	0	0	0	0	0	0	0	0	0	0	0	0	0	0	0	0	0	0	0	0	0	0	270.27	0	0	485.16	0	0	4153.63	11
O9	A4	0	0	0	0	0	0	0	0	0	0	0	0	372.53	0	191.3	0	83.73	0	0	0	0	2120.66	0	147.06	117.54	546.7	173.83	184.48	50.96	37.46	1202.9	19004.7	463.48	240.25	97.37	190.78	1231.82	1590.19	215	602.02	3504.47	141.37	974.02	2245.88	193.13	0	35923.6	11
O9	A5	0	0	0	0	0	0	0	0	0	0	3053.71	0	376.27	0	85.16	517.57	0	0	0	39.64	1454.62	82.15	105.38	61.38	269.51	1781.41	0	0	107.48	134.55	1804.17	10186.2	558.91	484.16	66.44	778.33	437.78	2500.43	194.32	4743.24	2013.53	226.58	945.88	1553.82	282.35	0	34845	11
O9	A6	0	0	0	0	0	0	0	0	1564.32	1411.37	380.59	603.35	1434.22	0	1526.43	218.31	215.38	374.73	0	586.67	950.71	2226.63	132.99	163.23	280.05	2222.84	253.21	118.5	183.44	1055.35	1039.86	19257.5	674.49	586.38	371.96	167.39	619.62	2693.14	175.07	2350.88	2333.54	153.75	2210.08	759.46	23.05	0	49318.5	11
O9	A7	0	0	0	0	0	0	0	0	623.93	0	0	0	0	0	36.88	0	101.21	0	64.14	1060.68	161.84	5980.66	0	513.34	145.47	4282.98	181.2	0	411.25	195.88	2355.92	34049.7	1648.19	668.75	128.83	578.34	610.16	5499.03	126.88	57.58	695.84	2006.88	906.09	1208.07	604.08	0	64903.8	11
O9	A8	0	0	0	0	0	0	0	0	0	0	0	0	0	0	43.25	0	66.63	0	0	771.96	48.37	2213.89	0	116.03	732.77	499.15	389	256.72	221.45	99.45	3085.4	19420.4	819.35	41.42	0	146.49	2447.48	0	96.67	779.89	692.99	145.62	58.54	95.09	0	0	33288	11
O9	A9	0	0	0	0	0	0	0	0	604.54	629.31	931.39	0	1481.41	0	224.86	0	796.02	198.2	0	668.21	1471.42	2319.41	192.62	113.7	313.69	589.78	1908.17	295.22	287.65	977.88	485.37	22865.6	576.46	128.24	137.54	392.46	198.38	1990.71	148.21	66.48	1508.05	658.46	330.97	622.19	570.82	0	44683.4	12
O9	A10	0	0	0	0	613.26	0	329.62	759.13	936.98	207.19	2063.3	186.23	686.81	350.27	969.6	195.06	145.57	181.1	62.26	304.35	106.5	18.55	30.94	0	0	85.27	0	19.69	0	0	0	83.16	0	0	0	0	23.12	97.86	233.21	32.43	16.67	61.73	0	0	0	0	8799.86	12
O9	A11	0	0	0	0	0	0	0	0	472.73	255.72	131.42	0	368.85	0	142.1	0	94.24	210.74	35.63	193.44	529.33	1421.27	78.12	62.23	182.37	1065.96	86.35	321.38	84.72	766.25	556.48	13116	450.62	333.29	82.04	88.51	318.95	1196.66	110	468.82	900.96	0	0	702.08	86.91	0	24914.2	12
O9	A12	0	0	0	0	0	0	0	0	0	0	0	0	40.47	0	42.89	0	103.05	0	0	60.78	104.25	0	290.24	27.26	47.7	202.7	0	6.66	154.51	60.56	200.23	1034.9	52.71	0	88.42	154.41	20.11	420.11	0	30.48	18.76	241.56	121.63	20.42	249.91	948.74	4743.46	12
O9	A13	0	0	0	0	0	0	0	0	362.96	149.87	221.78	901.68	2496.5	0	626.03	0	265.91	0	0	554.24	777.8	2128.09	99.37	108.58	468.56	876.93	339.34	210.59	48.05	197.13	2269.94	26634.2	565.24	251.57	150.69	1011.74	432.62	679.16	406.57	147.69	1755.67	74.55	718.51	1038.9	692.83	85.55	47748.8	12
O9	A14	0	0	0	0	0	0	0	0	232.83	216.74	316.71	408.47	1621.62	0	1673.92	0	1555.67	746.43	804.36	1291.71	558.31	657.28	97.93	1633.49	348.06	270.02	0	646.99	2198.07	662.11	904.38	2276.99	2778.1	487.2	2418.05	1553.54	4684.67	1114.75	1707.41	450.17	1152.51	803.94	1323.75	2186.21	414.9	0	40197.3	12
O9	A15	0	0	0	0	0	0	0	0	1550.78	1933.36	410.99	605.83	1132.03	1188	528.04	354.13	316.47	105.56	580.16	567.47	668.27	570.63	184.25	143.61	148.23	512.26	298.05	154.28	283.43	573.08	1091.72	8112.19	561.46	0	0	456	1667.06	102.39	52.12	1019.46	605.67	2467.32	674.94	300.32	1169.77	304.33	31393.7	13
O10	A1	0	0	0	0	0	0	0	0	39.81	17.21	21.79	0	60.24	0	0	0	122.77	200.57	37.12	350.62	400.62	692.24	0	200.82	87.69	153.45	504.69	3187.75	220.23	64.1	381.36	3734.86	201.73	141.33	126.88	141.06	465.08	189.18	101.56	238.27	1475.33	50.46	987.32	116.47	58.16	0	14770.8	13
O10	A3	0	183.15	303.56	0	898.18	0	0	0	461	0	89.05	0	0	0	0	0	70.3	126.14	94.24	150.85	68.83	972.45	480.05	91.91	300.62	245.98	0	5678.03	1496.8	151.63	68.38	2079.95	1024.89	437.3	181.12	36.27	120.08	1028.41	98.45	61.06	592.96	34.08	507.18	192.38	60.05	0	18385.3	13
O10	A4	0	0	0	0	0	0	0	25.63	16.23	0	0	0	12.17	0	0	0	46.03	20.1	0	234.89	407.86	469.98	0	113.37	9.52	253.24	67.74	67.67	255.46	156.97	262.83	2668.23	97.8	72.27	16.35	78.34	236.46	270.5	64.42	56.85	1515.49	29.39	1146.67	155.32	62.59	0	8890.37	13
O10	A5	0	0	0	0	0	0	0	0	0	0	0	0	0	0	0	0	117.35	105.23	0	0	0	2369.21	0	0	0	1079.6	0	414.21	250.38	385.32	93.5	770.18	299.38	319.21	0	393.85	0	0	0	0	1648.11	0	1670.11	131.64	0	920.3	10967.6	13
O10	A6	0	159.56	264.47	0	159.56	264.47	0	0	401.63	0	77.59	0	61.25	0	109.9	0	0	0	0	82.11	131.42	847.21	418.23	80.08	261.91	4946.77	1304.03	132.1	0	59.57	1812.08	83.71	380.98	157.79	0	31.6	895.96	44.74	53.19	24.39	516.59	58.79	441.86	167.6	52.32	377.59	14861.1	13
O10	A7	98.42	42.3	0	18.55	72.2	0	0	182.49	193.94	206.37	49.22	134.59	95.81	136.36	114.05	61.51	13.47	16.53	24.16	15.19	373.97	62.63	27.06	19.39	25.5	35.47	17.09	7.39	19.49	2.84	23.42	393.1	106.72	21.17	0	16.97	24.19	17.57	7.69	13.25	47.01	11.47	22.76	76.45	0	0	2847.76	13
O10	A8	445.35	39.25	258.93	0	0	0	0	0	99.9	0	0	0	0	0	0	0	84.03	31.97	389.54	132.59	0	1304.21	135.3	273.66	0	2114.87	0	0	0	0	624.3	7972.28	717.77	0	355	179.47	1103.35	62.42	89.54	29.87	1306.82	0	222.98	0	570.92	0	18544.3	13
O10	A9	0	0	0	0	0	0	0	0	0	0	0	0	0	0	0	0	714.57	818.68	0	0	753.32	527.22	0	0	136.31	614.84	2588.23	2317.79	924.1	452.61	222.14	4700.61	1412.32	904.07	523.74	1827.49	0	0	1300.53	181.43	3147.88	0	2316.47	685.56	0	9154.07	36224	13
O10	A11	0	0	0	151.94	0	0	70.41	0	49.39	0	235.4	0	518.12	846.03	510.77	129.46	101.45	0	0	0	93.66	209.33	0	0	149.3	305.73	0	0	58	42.39	268.5	1296.91	587.3	152.63	92.97	132.1	100.6	259.68	36.44	30.6	502.81	58.76	148.84	0	0	667.77	7807.29	13
O10	A12	0	0	0	309.04	376.5	0	0	0	474.92	0	0	0	97.09	0	0	0	621.95	0	0	164.61	98.66	950.08	0	84.82	227.68	263.24	0	452.57	221.59	117.61	324.69	5507.03	51.1	43.9	81.6	382.4	666.07	322.8	1224.68	168.12	321.5	403.6	3435.33	0	0	131.24	17524.4	13
O10	A13	0	0	0	0	0	0	0	0	106.71	0	0	0	0	0	0	0	96.83	0	0	118.15	407.28	1576.09	0	118.24	1302.77	0	189.99	116.53	89.67	117.49	510.9	10444.6	0	0	0	0	1317.68	573.15	0	0	858.46	1049.44	84.49	0	0	0	19078.5	13
O10	A14	0	0	0	0	0	0	0	0	173.14	0	0	0	0	0	0	0	85.4	103.24	0	219.24	0	221.42	31.29	55.61	0	73.95	167.82	457.39	224.15	94.3	82.27	1061.41	250.66	0	0	149.23	110.2	321.64	49.88	195.19	621.49	0	295	0	0	566.72	5610.64	13
O10	A15	258.1	48.84	0	0	0	0	0	0	33.83	0	25.52	0	16.7	0	0	0	31.74	0	0	41.18	54.94	324.08	365.04	287.05	0	52.27	0	70.75	24.79	366.9	471.75	3164.45	848.33	500.04	1023.81	16.12	493.46	302.35	833.06	215.27	465.83	0	465.83	5.99	18.42	253.49	11079.9	13
O11	A1	0	0	0	0	0	0	0	0	415.43	0	63.95	0	0	0	0	0	479.57	628.16	0	0	561.28	634.72	0	62.64	264.46	503.01	195.81	3912.93	1724.68	561.95	1808.04	6531.68	849.86	187.3	0	842.43	1503.23	1812.84	370.9	923.47	8223.51	287.65	2977.38	292.38	65.33	9153.66	45838.2	13
O11	A2	0	0	0	0	0	0	0	0	263.15	456.16	316.49	0	417.63	0	162.93	0	707.4	163.75	0	1007.29	1180.53	320.66	0	730.56	548.77	2076.91	259.94	2438.73	634.01	305.69	1341.96	13508.5	508.88	260.07	0	799.89	1249	4046.48	242.52	120.33	3679.56	204.58	877.54	1760.6	341.14	1814.78	42746.4	13
O11	A3	0	0	0	0	0	0	0	247.97	150	139.5	807.26	239.07	1109.25	395.79	593.88	0	672.22	691.83	945.13	488.86	262.73	257.56	0	205.23	32.38	56.21	70.64	94.87	0	41.59	183.34	527.17	276.55	145.69	174.53	219.34	126.22	360.64	282.89	267.5	649.6	95.77	324.74	87.62	208.66	945.61	12377.8	13
O11	A4	0	0	0	0	0	0	0	841.4	767.44	1144.28	1224.48	1049.38	1509.52	739.28	916.52	0	2860.04	0	0	0	5714.33	1780.32	0	857.77	875.31	950.43	0	16079.3	3297.84	1102.43	985.42	6375.79	827.02	501.38	268.79	613.94	280.07	1446.62	724.01	336.33	2380.18	445.97	3358.06	174.36	212.55	1647.21	62287.8	13
O11	A5	0	0	0	0	0	0	0	0	601.3	0	0	0	675.78	0	612.77	0	1102.29	0	0	0	110.07	1544.42	0	0	0	329.68	0	7887.22	1103.69	497.1	482.47	783.45	266.92	376.5	388.93	292.2	212.37	134.06	396.34	624.69	277.46	226.61	442.49	368.74	483.11	393.06	20613.7	13
O11	A6	0	0	0	0	0	0	0	0	212.57	0	0	0	162.33	146.5	137.33	216.89	726.9	105.11	152.11	390.06	1152.13	1959.53	27.41	181.24	123.36	1229.51	136.57	148.74	1068.2	1321.19	16732.4	0	461.33	181.35	135.74	171.24	887.9	1763.1	173.71	602.35	3221.49	161.91	1941.83	238.97	42.01	3086.79	39399.8	13
O11	A7	0	0	0	0	0	0	462	0	687.91	0	819.35	0	908.39	0	466.09	0	1529.43	0	797.13	2263.89	1364.63	1528.75	618.18	261.19	1102.53	6453.21	2441.49	575.82	406.22	0	0	10623.4	483.13	848.77	290.26	157.34	625.59	3174.66	10.8	520.42	1466.77	287.01	1258.39	678.41	617.46	3107.02	46835.6	13
O11	A8	0	0	0	0	0	0	0	372.33	0	0	0	0	0	0	0	0	744.69	122.12	0	357.95	486.29	2557.03	0	291.65	324.35	1083.46	102.31	180.52	408.56	156.45	1142.88	26836	728.2	473.97	162.52	682.07	1382.7	1920.86	168.99	599.76	3103.59	145.58	1085.58	375.06	0	7010.19	53005.7	13
O11	A9	0	0	0	0	0	0	0	0	108.67	0	0	0	11.1	0	0	0	113.46	0	0	154.39	340.77	0	0	40.3	67.42	325.27	0	0	0	0	254.16	1823.97	65.07	98.31	0	33.91	111.74	305.56	40.52	101.08	425.63	36.68	437.69	0	0	61.49	4957.19	13
O11	A10	0	0	0	0	0	0	0	0	0	0	0	0	0	0	0	0	422.07	0	0	0	0	441.98	0	142.45	0	100.38	0	0	0	143.13	105.67	2750.01	3265.86	196.23	194.63	221.71	206.15	752.99	117.91	154.95	827.04	93.7	985.26	0	0	2246.1	13368.2	13
O11	A11	0	0	0	0	0	0	0	0	57.52	78.68	43.44	347.52	137.89	40.72	0	111.11	397.79	0	0	246.05	264.32	612.3	0	117.06	156.43	1333.66	0	746.92	252.57	159	47.99	3860.53	353.47	100.33	41.8	191.91	404.83	1355.14	113.56	70.3	887.7	443.63	843.48	208.55	93.55	1944.1	16063.8	13
O11	A12	0	0	0	0	0	0	0	28.23	488.2	23.79	12.38	44.5	64.88	29.73	12.08	144.32	3.16	36.34	15.27	138.1	75.56	83.95	182.91	68.55	130.41	348.78	67.69	766.75	329.17	59.51	146.64	1163.77	858.95	204	104.72	590.32	126.94	798.9	25.52	121.67	36.96	41.41	142.52	231.81	81.68	331.35	8161.42	13
O11	A13	0	0	0	0	0	0	0	0	0	173.09	126.83	27.97	105.56	158.22	89.62	247.48	174.35	0	141.59	744.4	648.41	1815.26	0	0	186.56	163.78	78.53	4319.14	1336.48	71.76	511.54	11298.7	481.13	333	84.63	85.76	356.68	3832	21.43	595.82	1395.59	241.6	1346.49	509.73	248.73	1421.39	33373.3	13
O11	A15	0	0	0	0	0	0	0	204.9	164.45	0	0	0	196.22	280.8	163.67	789.59	102.45	0	0	0	738.91	552.02	0	0	1816.12	0	0	0	0	0	0	891.19	74.16	1912.06	0	901.47	452.38	770.01	128.69	88.55	3317.64	95.09	3109.83	0	126.61	1023.04	17899.8	13
O12	A1	0	0	0	0	0	0	0	0	99.76	0	130.8	0	0	0	0	0	0	0	0	139.35	45.79	994.72	0	423.53	0	1729.14	0	0	0	0	653.62	9397.97	106.87	0	0	88.76	694.02	160.38	70.95	241.28	1083.7	56.25	568.1	0	0	0	16685	13
O12	A2	365.86	0	0	0	0	0	0	0	0	0	0	0	0	0	0	0	151.13	0	593.9	115.13	126.59	313.28	0	738.81	0	3122.37	0	631.38	291.34	731.42	575.95	7133.45	3522.91	496.32	986.4	698.09	671.67	1607.04	0	290.7	2691.37	0	548.68	0	0	6328.05	32731.8	13
O12	A3	0	0	0	0	56.78	9.48	21.3	0	18532.3	0	0	0	0	0.38	136.23	96.17	33.75	0	0	0	0	462.46	0	0	175.16	531.35	0	64.54	0	60.92	295.9	4059.81	934.4	241.38	0	682.51	330.61	1009.12	89.32	0	603.19	0	265.09	0	0	345.45	29037.6	13
O12	A4	0	0	0	0	0	0	0	0	0	0	0	0	0	0	0	0	86.66	45.65	23.76	240.52	405.94	1077.74	0	0	400.49	451.03	608.47	105.25	0	137.11	646.63	9003.26	387.13	252.62	121.4	564.9	39.74	312.31	94.64	27.03	245.28	622.93	20.65	627.39	0	35.06	16583.6	13
O12	A5	0	0	0	0	0	0	0	0	0	0	46.79	0	0	0	105.85	105.22	175.94	0	0	2315.73	232.38	2216.2	112.87	18638.8	0	1551.1	162.17	145.35	266.81	310.74	483.08	14584.4	6139.64	139.44	907.64	432.92	36.53	1559.27	472.83	256.33	1234.41	199.14	676.31	209.56	979.27	432.87	55129.6	13
O12	A7	92.73	0	69.79	0	0	0	0	0	498.2	0	0	0	0	0	2.85	0	49.28	0	0	39.47	33.09	135.62	178.28	149.84	0	294.65	74.04	44.81	87.67	2.52	276.34	1271.57	884.47	173.3	122.37	607.91	238.05	610.28	76.15	142.39	230.08	38.22	109.25	0	0	1.94	6535.16	13
O12	A8	0	0	0	0	0	0	0	39.74	495.19	18.34	0	0	9.41	0	0	0	2.07	0	27.05	63.83	55.23	301.59	0	162.88	9.32	419.59	91.05	45.15	98.46	33.47	215.43	2561.45	856.19	157.71	32.03	478.47	303.65	607.83	68.98	107.63	448.75	65.89	175.92	118.07	0	83.46	8153.83	13
O12	A9	0	0	0	0	0	0	0	0	468.52	0	0	0	0	0	0	0	14.67	0	0	34.81	91.02	147.22	5952.28	1529.58	385.24	471.11	60.42	65.1	79.72	72.16	18.91	991.88	563.95	25.3	30.6	634.13	248.58	265.25	22.7	118.11	308.76	77.21	174.25	0	132.48	105.8	13089.8	13
O12	A10	0	0	0	0	0	0	0	0	0	0	0	0	0	0	0	0	14.73	0	0	24.54	43.36	125.32	0	0	83.55	377.82	124.98	20.99	19.58	11.65	53.16	1571.04	749.25	112.53	77.86	468.11	319.44	933.02	50.81	0	90.74	16.4	220.13	283.68	72.45	318.44	6183.58	13
O12	A11	741.54	0	0	0	0	0	0	0	0	0	0	0	301.89	0	0	0	878.14	0	0	617.9	222	1558.17	134.25	234.9	0	2690.8	0	303.48	0	0	758.75	14128.1	399.81	456.23	0	853.03	837.47	1925.63	130.79	388.14	6497.66	155.41	827.26	0	0	5433.55	40474.9	13
O12	A12	0	0	0	0	0	0	0	0	31.37	0	0	0	0	0	0	0	32.59	29.97	33.48	309.08	19.09	969.39	0	137.94	83.86	668.22	328.85	4135.05	121.8	128.52	64.1	104.06	1120.09	238.64	9.55	161.68	6270.36	72.51	291.65	140.26	1743.99	86.12	1451.11	34.93	19.66	0	18837.9	13
O12	A13	0	0	0	0	0	0	0	0	466.95	10.61	52.3	4.18	0	0	11.3	0.06	19.3	0	23.59	23.43	111.31	154.88	0	101.01	133.42	52.22	95.3	65.17	87	19.29	227.54	1735.13	886.49	190.76	880.81	185.41	3769.68	952.48	152.72	27.31	1293.49	33.26	1072.06	82.19	113.61	471.11	13505.4	13
O12	A14	0	0	0	0	0	0	0	0	530.11	0	105.95	0	44.19	125.88	0	0	136.94	0	0	581.13	132.63	1240.95	0	361.3	0	1614.95	55.52	669.97	0	0	52.14	9224.2	180.07	93.44	0	505.65	195.31	906.29	149.23	1313.18	76.61	89.34	447.49	0	0	0	18832.5	13
O12	A15	0	0	0	0	0	0	0	0	189.85	199.48	134.73	0	42.5	0	0	0	0	0	0	321.61	198.45	332.5	49.12	455.13	170.56	377.87	0	695.98	321.61	198.45	372.64	626.88	1136.43	165.32	135.73	533.56	151.43	1432.03	179.64	281.54	1739.77	118.51	3225.7	0	0	3604.28	17391.3	13
O13	A1	0	0	0	0	0	0	0	0	68.44	0	0	0	113.51	0	52.77	0	22.81	0	0	235.7	135.3	959.36	0	218.31	421.93	715.05	63.45	537.44	212.99	30.19	263.66	4764.8	211.69	111.07	132.59	95.3	636.78	1910.46	135.68	143.85	3167.4	73.44	1777.95	119.13	53.29	119.22	17503.6	13
O13	A2	0	0	0	0	0	0	0	0	214.07	0	308.72	0	0	0	0	0	179.7	0	0	405	381.41	1764.64	68.64	133.19	0	859.02	437.65	2043.29	1171.46	168.03	695.99	11929.2	373.83	419.88	98.57	144.86	1385.95	386.1	639.89	484.15	4435.3	121.38	2430.88	265.96	117.59	173.16	32237.5	14
O13	A3	0	0	0	0	0	0	0	0	0	0	304.41	0	0	0	0	0	64.38	68.75	43.52	317.43	305.18	1198.59	35.84	57.39	199.15	933.04	926.52	70.81	103.04	200.44	311.72	5574.6	112.94	540.01	1102.41	33.38	79.56	1540.38	165.57	264.8	1845.11	154.63	778.53	122.28	25.3	1021.88	18501.6	14
O13	A4	0	0	0	0	531.94	0	0	50.9	314.07	1190.19	406.43	245.86	601.31	0	537.63	94.93	469.31	207.12	190.6	821.27	308.27	891.64	837.17	152.84	146.75	494.84	123.13	354.24	69.73	95.83	487.87	3947.94	252.91	74.56	130.22	214.3	531.86	201.22	243.71	350.81	3023.16	135.86	2071.07	0	0	278.09	21079.6	14
O13	A5	0	0	0	0	0	0	0	0	0	0	188.15	96.32	73.63	0	0	0	126.14	0	99.15	350.61	306.26	1256.35	75.96	251.06	140.43	1241.64	211.72	1063.64	841.21	61.86	312.14	7934.57	159.84	165.16	686.32	276.99	293.89	691.81	1681.21	427.08	205.57	695.24	132.08	164.96	0	0	20211	14
O13	A6	0	0	0	0	0	0	0	0	93.76	87.04	31.67	0	0	0	132.42	0	142.38	0	95.79	466.03	558.4	1702.02	81.86	232	112.75	753.38	951.98	141.92	1251.93	620.08	646.31	11929.5	868.27	273.04	74.03	406.97	535.19	905.35	130.67	323.24	1643.86	128.39	1035.45	165.5	71.36	82.13	26674.7	14
O13	A7	0	0	0	0	0	0	0	0	903.77	0	0	0	0	0	0	0	0	0	0	1135.39	3369.11	6270.61	0	492.44	1662.54	5021.91	76.84	558.68	185.53	477.34	2125.61	55445.4	3690.29	246.51	74.08	655.38	2661.5	266.06	357.37	1008.09	1514.33	732.5	4160.95	0	537.75	4401.75	98031.8	14
O13	A8	2308.18	0	0	0	0	0	0	0	449.28	0	2125.03	0	581.78	252.39	127.32	0	2265.73	0	0	620.25	333.99	0	0	5918.94	2060.03	767.4	1424.79	930.59	689.3	648.69	1371.09	27280.7	37741.7	1268.69	685.27	656.67	914.18	1395.65	1018.04	751.33	1563.03	344.58	1067.55	982.33	0	1042.14	99586.6	14
O13	A9	3887.53	175.54	76.58	0	117.19	0	0	126.7	25137.6	0	28.48	0	0	0	34.01	0	35.69	0	0	0	0	295.62	119.83	318.38	0	603.34	136.04	71.63	69.08	125.32	89.79	3375.77	79.72	665.78	30.55	301.19	419.94	682.83	47.97	135.75	1925.55	17.12	115.79	0	214.71	772.6	40233.6	14
O13	A10	0	1331.69	0	0	619.32	0	0	0	51.01	80.02	322.89	490.98	342.11	201.58	258.14	0	395.55	45.9	34.24	209.25	241.66	196.78	731.07	0	158.52	332.72	71.89	132.91	197.59	135.4	567.26	3756.57	453.29	0	0	0	368.94	432.35	84.74	79.82	1374.29	73.71	919.6	95.63	0	0	14787.4	14
O13	A12	0	0	0	0	0	0	0	0	55.75	26.74	87.85	146.98	163.9	0	178.55	108.28	140.94	195.29	89.96	763.52	700.61	1398.21	167.87	1460.21	62.24	150.22	1073.05	162.67	0	76.56	67.46	4916.23	145.69	391.57	334.82	315.75	515.97	2712.39	195.05	128.19	2135.84	81.74	1277.24	167.12	138.47	0	20732.9	14
O13	A13	0	0	0	0	0	0	0	0	0	0	20.7	25.59	77.83	42.37	9.89	10.14	19.97	0	0	170.5	132.82	893.59	39.49	64.4	60.97	291.95	502.64	51.55	456.36	281.05	238.67	5466.04	167.16	109.92	33.1	483.23	311.09	2008.89	72.48	191.95	1084.74	43.32	743.52	85.64	36.3	61.88	14289.7	14
O13	A14	0	0	0	0	0	0	0	0	350.05	0	0	0	0	0	0	0	93.65	0	0	69.33	262.26	1907.87	76.64	198.8	174.5	1923.05	0	0	132.41	360.39	196.03	4019.8	168.7	214.47	77.23	514.54	1252.91	5753.16	272.1	470.04	10911.8	490.66	2246.34	6749.21	0	0	38886	14
O13	A15	0	0	0	0	0	0	0	0	23.3	17.22	62.42	63.73	152.43	0	125.97	0	56.3	0	278.61	440.87	495.54	474.59	150.23	466.9	31.26	516.7	590.4	493.59	28.01	107.99	168.41	4571.78	453.54	295.41	549.58	1293.2	611.12	297.6	327.84	505	4620.68	53.77	3351.87	160.34	0	0	21836.2	15
O14	A1	0	0	0	0	0	0	0	0	117.33	0	183.88	0	243.68	0	0	0	738.13	0	146.3	0	0	3992.7	547.13	175.39	207.24	59.58	107.48	415.54	182.9	258.89	1286.82	21661.4	135.44	1739.12	441.28	102.47	761.28	5999.96	113.08	196.65	5435.59	350.78	4209.47	409.97	100.01	2268.54	52588	15
O14	A2	0	0	0	0	0	0	0	0	0	0	0	0	0	0	0	0	3122.39	0	0	3057.22	0	0	0	0	1309.28	1216.6	1443.77	7369.75	0	0	0	4727.71	1275.22	945.09	719.79	1083.02	607.18	1583.54	1081.48	3031.59	2209.17	679.54	1188.26	409.5	0	1434.51	38494.6	15
O14	A3	0	0	0	0	0	0	0	0	323.61	0	256.84	0	432.46	0	197.49	281.43	226.07	0	201.55	159.18	191.25	386.31	0	76.67	181.79	215.53	0	0	0	0	132.43	394.21	0	0	0	0	178.73	148.89	0	0	284.65	0	265.11	0	0	0	4534.2	15
O14	A4	0	0	0	0	0	0	0	0	590.31	0	599.14	0	834.77	0	740.25	0	515.59	0	0	335.46	934.51	560.29	0	373.02	319.34	894.66	764.61	833.96	215.2	117.47	128.69	4272.71	508.49	2107.16	398.11	516.9	1051.19	1142.55	383.61	1110.76	2441.12	670.35	3869.27	0	0	1067.8	28297.3	15
O14	A5	0	0	0	0	0	0	0	329.69	279.36	504.86	524.38	463.45	618.74	506.1	543.76	0	0	1100.53	623.45	1500.76	782.43	2581.64	528.67	715.77	579.59	2116.2	5286.06	1689.44	108.22	625.52	270.86	11140.6	1534.99	673.51	301.31	67.27	954.08	335.99	513.51	1690.21	3421.86	193.13	4814.3	227.26	298.33	1717.26	50163.1	15
O14	A6	0	0	0	0	0	0	0	0	0	0	0	0	0	0	0	0	32.85	0	0	223.58	38.16	1256.46	0	51.31	256.64	275.62	134.17	57.31	133.26	115.92	2439.64	7810.65	219.48	141.75	0	107.1	371.15	1971.64	211.39	167.22	6318.68	66.67	3143.72	0	303.92	0	25848.3	15
O14	A7	0	0	0	0	0	0	0	0	0	0	0	0	0	0	0	0	119.02	0	64.23	0	853.18	1468.84	113.64	282.05	0	2429.53	434.21	288.79	201.26	229.06	272.93	7759.43	520.29	386.18	0	886.06	3808.83	396.31	173.7	244.62	4938.37	151.71	7792.17	577.69	0	2141.54	36533.6	15
O14	A8	0	0	0	0	0	0	0	455.47	412.86	0	441.27	0	1070.87	0	0	0	637.19	0	380.51	881.69	1024.46	1726.01	320.38	282.01	1496.46	5852.63	300.07	1581.12	474.45	186.67	331.18	7163.52	1514.2	414.98	205.17	129.42	500.35	5984.36	819.58	174.87	1245.84	106.67	1056.14	139.67	68.3	1042.93	38421.3	16
O14	A9	0	0	0	0	0	0	0	300.16	268.13	0	1422.94	0	2209.79	0	2243.48	0	2019.06	1160.25	317.04	338.61	828.34	476.88	128.84	311.97	181.34	103.9	137.42	301.84	98.68	112.06	215.89	880.19	405.65	165.88	851.38	533.63	157.35	254.1	52.89	99.17	1209.14	239.39	623.01	129.11	199.68	0	18977.2	17
O14	A10	0	0	0	0	0	0	0	34.87	26.51	358.04	47.13	246.05	153.18	352.26	279.28	320.45	3857.01	0	93.31	0	1213.68	1096.4	340.23	94.64	115.07	165.85	339.44	100.15	113.79	337.24	239.93	5047.84	65.55	249.73	9.68	27.07	247.93	1231.37	62.36	773.7	304.68	248.85	822.82	58.52	86.73	266.15	19427.5	17
O14	A11	0	0	0	0	0	0	0	0	60.83	0	88.29	0	71.38	0	0	0	134.64	0	0	315.86	311.34	2630.11	34.54	246.7	1234.39	12170.1	373.89	362.81	179.28	112.49	1578.82	25716.7	745	325.22	261.15	310.91	835.11	853.28	297.12	404.07	4721.77	115.85	3571.65	370.57	221.18	4696.1	63351.1	17
O14	A12	0	0	0	0	0	0	0	0	0	0	0	0	0	0	0	0	284.25	0	293.38	205.05	491.07	901.71	0	0	1032.13	1442.7	1109.13	163.29	285.06	442.08	1141.36	10850.5	650.02	967.47	139.52	175.67	413.99	3142.57	279.09	821.4	2195.3	147.88	2849.6	354.32	160.93	3010.76	33950.2	18
O14	A13	0	0	0	0	0	0	0	258.47	297.06	129.7	234.15	181.85	132.31	155.31	168.04	192.14	306.05	0	0	153.72	277.97	57.17	809.09	197.96	566.17	822.52	0	0	0	200.85	347.27	2131.26	2378.55	529.26	286.18	129.02	160.17	3014.97	167.81	431.74	993.37	99.75	1067.68	113.26	318.27	662	17971.1	18
O14	A14	0	0	0	0	0	0	0	0	0	0	0	0	0	0	207.04	0	902.58	0	0	289.8	1278.49	0	0	0	767.17	594.67	700.46	1383.56	0	0	379.87	5184.3	736.61	1501.46	0	530.52	411.08	1663.85	1253.67	1509.97	1695.21	0	952.19	0	0	520.85	22463.4	18
O14	A15	0	0	0	0	0	0	0	0	0	0	423.08	0	873.83	0	767.42	0	444.37	0	227.45	543.98	970.38	874.65	515.33	286.66	765.12	2052.93	259.63	887.33	307.24	546.28	132.61	2306.02	826.53	139.04	0	530.52	576.74	4755.7	356.26	1371.53	1656.06	195.77	3526.42	0	0	1106.34	28225.2	18
O15	A1	0	0	0	0	0	0	0	0	1139.78	0	357.87	0	0	0	0	0	0	0	0	0	0	916.45	2742.45	203.48	392.75	1274.73	0	337.46	1090.33	170.03	643.47	5501.83	934.4	3847.72	411.89	618.54	1078.21	2487.26	210.09	325.67	2464.49	240.01	1730.42	528.73	0	1002.67	30650.7	18
O15	A2	0	0	0	0	0	0	0	0	0	0	0	0	0	0	0	0	365.34	0	31.27	0	2060.94	4301.08	0	256.18	221.65	2511.34	287.8	185.14	62.76	857.87	4082.07	49361.8	1077.63	311.3	508.01	1661.68	1174.8	4733.16	0	1079.51	5097.74	235.61	3580.91	1430.63	191.86	15516.4	101184	18
O15	A3	0	0	0	0	0	0	0	180.4	263.2	275.9	0	0	0	0	391.25	0	4048.06	0	0	671.97	70.74	433.29	0	496.25	504.29	199.59	127.91	171.67	89.99	145.2	243.05	512.67	292.01	588.27	141.22	282.55	551.38	211.93	91.09	196.36	723.69	138.29	997.32	148.47	138.98	509.65	13836.6	18
O15	A4	0	0	0	0	559.72	0	0	0	242.33	1627.32	331.62	0	1472.97	0	1356.83	0	1821.58	0	0	0	0	323.67	0	177.84	151.2	356.24	280.29	373.3	172.54	158.88	110.15	700.06	114.19	571.75	186.13	557.38	159.14	936.72	328.04	564	2897.29	252.38	2154.8	0	0	772.45	19710.8	18
O15	A5	389.68	204.2	0	0	0	0	0	0	704.47	0	464.42	0	0	0	0	0	145.07	0	0	715.09	623	6032.48	90.99	393.12	464.38	3009.7	350.23	229.36	186.7	97.81	2876.86	36459.8	1317.8	594.84	1568.21	602.19	4593.28	2407.79	229.8	630.02	1768.07	207.58	1677.76	0	74.05	0	69108.8	18
O15	A6	0	0	0	0	0	0	0	832.92	917.71	448.05	811.41	751.25	1020.59	998.11	984.44	448.53	3764.9	0	1595.97	597.57	1909.97	1246.01	0	1014.64	1035.12	347	19600.7	2831.53	204.51	267.65	475.26	2146.36	656.39	427.88	84.59	344.06	295.74	276.68	201.51	287.03	1385.26	578.44	1088.67	348.04	0	509.76	50734.3	19
O15	A7	0	0	0	0	0	0	0	0	588.38	0	0	0	0	0	0	0	1347.6	0	0	0	0	377.49	0	0	2833.53	3720.93	0	0	0	0	0	1626.9	1190.08	192.42	548.78	759.7	698.14	327.03	684.3	123.25	913.12	472.56	529.97	0	0	382	17316.2	19
O15	A8	0	0	0	0	249.77	0	0	58.92	165.81	0	199.47	0	0	0	555.55	0	663.49	0	0	0	619.55	2801.45	17.16	234.97	133.58	700.56	170.85	88.73	15.65	53.34	2786.7	8821.48	2191.78	0	268.95	1463.39	76.85	120.06	74.59	0	570.82	185.55	577.95	296.06	131.23	721.06	25015.3	19
O15	A10	0	0	0	0	0	0	0	0	410.68	283.42	461.79	0	379.04	0	815.62	0	1243.25	0	0	0	0	532.33	164.1	286.78	2624.64	6219.93	1017.8	380.18	185.05	375.43	134.8	1790.27	207.41	462.3	149.85	55.66	180.1	912.84	184.1	216.72	529.97	235.01	430.16	0	0	576.73	21446	20
O15	A11	0	0	0	0	0	0	0	0	151.77	0	0	0	450.87	0	160.94	0	831.24	0	949.85	444.55	1935.8	793.06	0	61.58	204.52	215.78	148.06	257.39	0	44.75	617.44	2934.8	186.35	365.5	181.66	280.68	68.83	134.86	179.69	382.87	307.5	58.6	211.56	166.93	0	0	12727.4	20
O15	A12	0	0	0	0	0	0	0	174.51	285.54	330.34	499.88	0	686.01	0	0	0	215.95	0	0	0	480.32	4354.03	23.15	300.69	96.6	909.11	297.63	80.7	177.09	388.81	3282.79	25675.5	38.3	87.75	517.88	2449.44	181.23	3071.76	340.9	1286.06	3082.18	293.22	1235.47	0	0	0	50842.8	21
O15	A13	0	0	0	0	0	0	0	0	0	0	166.44	0	136.1	0	320.5	0	95.91	0	143.32	245.32	163.76	1270.26	0	0	485.81	1593.05	111.71	181.07	235.44	372.91	1085.36	5780.93	792.33	228.63	206.37	277.12	106.08	1356.73	236.94	471.07	2032.81	318.42	1439.28	268.73	149.15	0	20271.5	21
O15	A14	0	0	0	0	0	0	0	0	394.25	0	0	0	0	0	60.51	0	142.9	0	0	251.11	0	14.94	128.78	39.17	63.01	393.13	339.31	267.31	32.23	85.83	80.16	2673.6	837.9	112.99	95.48	665.93	227.26	299.22	66.63	96.61	427.11	22.75	130.39	56.21	98.07	239.31	8342.1	21
O15	A15	0	0	0	0	0	0	0	149.4	345.65	139.98	67.09	129.97	148.9	255.6	300.89	341.56	103.75	487.87	305.81	309.27	436.02	258.01	124.17	279.37	82.74	658.25	300.13	95.55	34.62	91.22	64.55	3171.73	839.79	221.7	87.84	624.38	297.23	924.93	12.2	145.82	266.42	11.51	141.13	29.37	87.16	275.56	12647.1	21
O16	A1	0	0	0	0	0	0	0	0	0	0	0	0	0	0	0	0	52.8	10.91	18.39	62.85	49.92	153.93	0	108.87	150.03	277.16	96.63	65.97	90.46	36.45	180.22	1968.08	732.3	156.79	131.94	635.9	209.8	25.09	62.06	131.03	75.82	12.75	144.78	95.2	129.46	0	5865.59	21
O16	A2	0	0	0	0	0	0	0	0	0	0	0	0	0	0	0	0	0	0	0	145.07	42.29	2318.91	0	211.52	348.83	2177.39	120.43	92.46	0	0	238.77	3883.27	103.6	773.92	383.49	57.61	323.25	8264.47	140.66	170.37	2738.67	335.24	2553.66	0	0	0	25423.9	21
O16	A3	0	0	0	0	0	0	0	83.14	70.14	0	0	0	0	0	0	0	148.33	0	181.21	584.68	137.95	1070.17	0	0	125.14	719.61	98.5	0	103.2	82.12	242.98	310.01	105.36	686.02	173.99	63.89	847.34	1067.99	132.62	424.98	980.6	33.56	882.44	226.56	81.59	0	9664.12	21
O16	A4	0	0	0	0	0	0	0	0	207.18	0	0	0	0	0	0	0	413.23	0	533.23	457.85	842.76	5019.42	349.04	395.71	265.35	3808.43	204.95	1446.16	905.24	150.18	1622.55	29838.4	2928.04	365.41	114.76	569.41	881.22	8063.7	450.97	202.87	2296.2	188.11	1027.75	649.16	207.67	0	64405	22
O16	A5	0	0	0	0	0	0	0	33.4	0	0	0	0	0	0	0	0	22.39	0	0	21.01	44.24	157.55	244.36	96.51	64.26	84.47	10.36	140.44	100.97	45.77	57.99	779.47	723.49	218.87	138.46	378.21	257.11	663.92	64.51	135.85	340.93	77.4	124.46	95	117.74	0	5239.14	22
O16	A6	0	0	0	0	739.29	114.48	86.46	81.86	766.54	77.64	113.64	126.63	217.49	181.2	244.38	0	395.71	58.4	604.26	262.37	1790.49	144.76	0	110.58	303.77	1262.97	0	147.9	225.9	424.5	1230.79	12847.3	173.36	0	0	1286.61	319.67	301.89	613.19	164	1471.94	367.11	1461.9	281.14	0	0	29000.1	22
O16	A8	0	0	0	0	0	0	0	0	181.78	0	0	0	0	0	0	0	101.71	0	71.19	520.23	247.11	2570.04	210.33	573.73	0	2033.06	153.17	0	69.83	162.48	842.23	19371.5	392.87	350.3	223.24	787.05	323.17	1708.61	406.61	578.99	1155.88	469.46	844.95	0	405.94	0	34755.4	22
O16	A9	0	0	0	0	0	0	0	0	371.77	0	0	0	0	0	0	0	14.52	0	0	50.75	117.36	7236.64	119.29	387.59	307.76	519.95	75.03	8.77	1868.39	71.82	257.82	4213.11	321.48	178.32	102.9	632.73	68.44	990.94	73.38	120.25	572.25	70.71	195.47	126.68	94.56	0	19168.7	22
O16	A10	0	0	0	0	0	0	0	0	654.19	0	0	0	0	0	1276.84	0	787.05	0	381.49	1416.05	453.64	963.48	399.82	564.75	131.88	1078.55	111.81	61.23	151.17	194.04	533.38	13830.5	610.26	157.09	1024.48	1100.08	1190.54	1458.55	1528.02	756.76	1604.32	0	142.33	0	0	205.17	32767.5	22
O16	A11	0	0	0	0	0	0	0	0	473.71	0	0	0	0	0	0	0	0	0	0	39.15	31.52	351.61	0	103.16	133.79	337.07	2.12	33.75	83.78	99.07	231.85	3744.99	276.34	0	0	401.02	245.77	461.75	61.17	124.56	190.32	51.17	234.74	0	0	0	7712.41	22
O16	A12	0	0	0	0	0	0	0	29.8	268.89	0	0	0	0	0	0	0	226.55	0	0	386.44	436.87	2587.61	0	118.57	819.72	698.38	229.29	136.81	255.63	83.38	1397.64	17260.2	1141.64	176.82	281.87	390.49	1161.85	157.81	62.84	947.8	58.68	57.62	83.79	0	0	0	29456.9	22
O16	A14	0	0	0	0	0	0	0	0	953.58	0	353.54	0	0	0	0	0	675.3	0	0	0	0	1957.27	334.91	331.91	949.33	2200.53	423.02	247.06	750.37	0	7327.14	7772.61	578.93	1578.38	248.86	237.26	179.44	2879.77	236.75	1339.23	4708.26	0	0	0	0	0	36263.5	22
O16	A15	0	0	0	0	0	0	0	0	650.9	0	0	0	0	0	0	0	162.57	0	0	849.32	0	1062.94	148.09	163.83	227.63	2087.47	0	0	174.3	347.23	211.23	5272.31	1153.92	0	0	570.81	83.49	3265.78	0	267.67	332.23	280.7	0	0	0	0	17312.4	22
O17	A1	0	0	0	0	0	0	0	291.17	314.75	769.06	841.49	684.8	873.05	1347.05	2108.8	37	1000.56	684.8	873.05	251.66	86.89	2108.8	139.3	903.79	114.64	320.87	47.83	73.93	159.91	259.5	452.42	8056.17	197.04	82.18	87.42	62.67	469.19	2131.89	215.29	1300.57	2235.41	48.76	1261.38	6190.16	0	0	37083.2	22
O17	A3	0	0	0	0	0	0	0	0	414.8	430.79	0	340.59	388.77	476.24	477	1505	1070.77	1007.26	0	0	482.92	914.46	113.52	0	215.13	703.18	238.75	393.78	0	0	0	4826.66	1022.91	717.5	314.69	655.45	3069.87	520.68	197.12	272.77	743.64	230.24	874.71	373.95	231.17	5343.99	28568.3	22
O17	A4	0	0	0	0	0	0	0	0	0	0	105.18	0	0	129.73	0	0	81.33	429.51	0	496.88	1085.69	1093.08	0	3833.43	207.95	96	203.23	732.46	154.03	212.77	2224.32	13881.4	505.54	168.14	0	412.9	564.59	81.2	554.1	126.95	1982.66	238.67	524.06	131.01	0	8345.94	38602.8	22
O17	A5	0	0	0	0	0	0	0	0	479.4	0	15.7	0	44.28	0	0	0	52.4	12.72	9.55	0	40.86	161.62	0	105.82	156.47	427.09	71.32	36.55	48.85	16.72	12.92	252.13	786.88	198.28	0	522.72	322.14	749.05	70.44	5.83	264.56	76.97	78.91	81.93	118.4	978.93	6199.44	22
O17	A6	0	0	0	0	0	0	0	1170.97	469.17	0	632.1	0	1592.17	687.89	896.08	1026.87	3005.31	1712.37	842.25	491.53	4698.82	482.43	1062.94	120.29	103.48	79.06	156.26	155.03	194.46	312.39	134.05	1577.28	27.19	543.28	93.91	251.38	117.24	1187.34	875.68	86.43	185.32	286.05	0	1802.65	0	0	27059.7	22
O17	A7	0	0	0	0	0	0	0	1039.72	1040.08	593.4	1511.21	1357.11	1274.4	1623.22	2354.99	1640.67	3219.53	1863.25	878.84	0	0	1168.61	383.86	1469.64	230.03	1204.41	758.25	14929.3	4230.57	0	374.46	1980	481.83	1321.07	289.09	411.82	605.27	177.04	375.48	251.54	609.2	157.76	323.04	3099.63	244.67	1377.05	54850	22
O17	A8	0	0	0	0	0	0	0	0	202.64	0	175.16	0	373.02	0	440.77	154.04	439.99	233.34	268.82	21.95	357.57	436.81	802.3	2252.68	253.58	310.3	162.46	1301.44	465.71	191.63	428.53	2166.24	188.39	124.08	57.35	1176.98	80.95	147.91	593.15	88.44	779.51	158.14	853.2	256.18	81.12	4882.75	20907.1	22
O17	A9	0	0	0	0	0	0	0	411.13	456.26	399.45	495.02	449.8	639	348.61	475.49	349.13	737.16	646.26	209.81	1629.65	1152.82	2512.88	316.62	1462.25	580.56	435.03	272.09	2698.73	1048.04	630.68	2026.65	11065.6	303.11	1525.46	171	315.77	269.52	572.31	165.58	233.65	1277.18	143.41	908.85	771.16	237.83	5708.68	44052.2	22
O17	A10	0	0	0	0	0	0	0	0	44.79	0	38.33	0	91.88	0	33.16	0	108.58	0	0	247.08	433.95	543.29	26.25	79.53	122.67	108.89	83.33	286.56	153.2	97.25	415.25	2972.29	0	252.09	391.19	264.56	95.3	937	64.29	439.21	683.01	58.87	493.83	153.07	88.58	3575.37	13382.7	22
O17	A11	0	0	0	0	0	0	0	0	0	0	22.14	35.25	71.81	0	57.77	0	65.45	0	26.02	416.58	1005.88	1166.16	0	0	1682.94	1056.96	94.07	160.96	79.19	266.42	399.87	10341.2	220.75	470.01	501.51	214.29	932.33	1901.88	323.33	319.1	958.3	199.78	2763.32	99.07	50.31	1762.2	27664.9	22
O17	A12	157.94	0	0	45.82	0	0	0	0	446.42	97.8	90.7	0	0	0	0	0	53.88	41.67	50.73	424.19	0	717.92	0	726.92	134.63	753.54	53.25	63.89	24.75	19.2	354.63	4704.43	2094.72	319.8	148.04	113.74	499.05	47.52	25.28	194.39	455.31	114.07	256.3	0	0	747.73	13978.3	22
O17	A13	0	0	0	0	0	0	0	0	0	0	117.49	0	0	0	0	0	226.85	78.39	155.78	407.17	496.82	1545.93	132.88	91.29	67.94	284.92	0	667.86	106.61	185.82	928.72	12358.9	26.59	148.95	0	1279.82	319.34	465.05	128.26	66.42	881.11	33.61	467.31	80.85	0	0	21750.6	22
O17	A14	0	0	0	0	0	0	0	80.57	0	0	0	0	0	0	0	0	53.82	12.58	12.51	45.07	31.05	367.92	0	155.77	19.52	377.81	20.17	53.87	87.67	9.83	174.67	2214.35	802.18	143.89	123.68	579.9	96.7	593.79	55.1	97.23	412.97	0	76.46	133.07	129.85	61.72	7023.72	23
O17	A15	0	0	0	0	0	0	0	591.21	830.11	1518.93	979.68	1925.66	1375.68	976.87	1320.14	2058.46	2409.76	0	0	14.88	177.91	1362.37	190.24	501.33	872.18	6940.11	228.24	1257.65	301.72	653.32	305.72	737.81	165.27	490.35	617.51	803.44	379.68	1295.23	307.29	292.66	437.07	894.87	4629.47	2693.83	0	0	40536.7	23
[truncated: 21 more columns]
